---

1 **Immune Landscape of Invasive Ductal Carcinoma Tumour Microenvironment**

2 **Identifies a Prognostic and Immunotherapeutically Relevant Gene Signature**

3 **Xuanwen Bao**<sup>1, 2\*‡</sup>, **Run Shi**<sup>3\*</sup>, **Kai Zhang**<sup>4</sup>, **Shan Xin**<sup>1</sup>, **Xin Li**<sup>5</sup>, **Yanbo Zhao**<sup>4</sup>,

4 **Yanfang Wang**<sup>3‡</sup>

5 1) Institute of Radiation Biology, Helmholtz Center Munich, German Research

6 Center for Environmental Health, 85764 Neuherberg, Germany

7 2) Technical University Munich (TUM), 80333 Munich, Germany

8 3) Ludwig-Maximilians-Universität München (LMU), 80539 Munich, Germany

9 4) Department of Cardiology, Sir Run Run Shaw Hospital, Zhejiang University  
10 School of Medicine, 310016 Hangzhou, China

11 5) College of Life Sciences, Nanjing University, 210093, Nanjing, China

12

13 ‡ **Corresponding author:**

14 **Xuanwen Bao:** [xuanwen.bao@helmholtz-muenchen.de](mailto:xuanwen.bao@helmholtz-muenchen.de);

15 **Yanfang Wang:** [yangfang.wang@cup.uni-muenchen.de](mailto:yangfang.wang@cup.uni-muenchen.de)

16

17 **Email address: Xuanwen Bao:** [xuanwen.bao@helmholtz-muenchen.de](mailto:xuanwen.bao@helmholtz-muenchen.de); **Shan Xin:**

18 [shan.xin@helmholtz-muenchen.de](mailto:shan.xin@helmholtz-muenchen.de); **Kai Zhang:** 3317020@zju.edu.cn; **Xin Li:**

19 [Shin.Lee@outlook.com](mailto:Shin.Lee@outlook.com); **Yanbo Zhao:** zhaoybzju@zju.edu.cn; **Run Shi:**

20 [Run.Shi@med.uni-muenchen.de](mailto:Run.Shi@med.uni-muenchen.de); **Yanfang Wang:**

21 [yangfang.wang@cup.uni-muenchen.de](mailto:yangfang.wang@cup.uni-muenchen.de).

22

---

23 **Abstract**

24 **Background:** Invasive ductal carcinoma (IDC) is a clinically and molecularly distinct  
25 disease. Tumour microenvironment (TME) immune phenotypes play crucial roles in  
26 predicting clinical outcomes and therapeutic efficacy.

27 **Method:** In this study, we depict the immune landscape of IDC by using  
28 transcriptome profiling and clinical characteristics retrieved from The Cancer Genome  
29 Atlas (TCGA) data portal. Immune cell infiltration was evaluated via single-sample  
30 gene set enrichment (ssGSEA) analysis and systematically correlated with genomic  
31 characteristics and clinicopathological features of IDC patients. Furthermore, an  
32 immune signature was constructed using the least absolute shrinkage and selection  
33 operator (LASSO) Cox regression algorithm. A random forest algorithm was applied  
34 to identify the most important somatic gene mutations associated with the constructed  
35 immune signature. A nomogram that integrated clinicopathological features with the  
36 immune signature to predict survival probability was constructed by multivariate Cox  
37 regression.

38 **Results:** The IDC were clustered into low immune infiltration, intermediate immune  
39 infiltration, and high immune infiltration by the immune landscape. The high  
40 infiltration group had a favourable survival probability compared with that of the low  
41 infiltration group. The low-risk score subtype identified by the immune signature was  
42 characterized by T cell-mediated immune activation. Additionally, activation of the  
43 interferon- $\alpha$  response, interferon- $\gamma$  response and TNF- $\alpha$  signalling via the NF $\kappa$ B  
44 pathway was observed in the low-risk score subtype, which indicated T cell activation

---

45 and may be responsible for significantly favourable outcomes in IDC patients. A  
46 random forest algorithm identified the most important somatic gene mutations  
47 associated with the constructed immune signature. Furthermore, a nomogram that  
48 integrated clinicopathological features with the immune signature to predict survival  
49 probability was constructed, revealing that the immune signature was an independent  
50 prognostic biomarker. Finally, the relationship of VEGFA, PD1, PDL-1 and CTLA-4  
51 expression with the immune infiltration landscape and the immune signature was  
52 analysed to interpret the responses of IDC patients to immune checkpoint inhibitor  
53 therapy.

54 **Conclusion:** Taken together, we performed a comprehensive evaluation of the  
55 immune landscape of IDC and constructed an immune signature related to the  
56 immune landscape. This analysis of TME immune infiltration patterns has shed light  
57 on how IDC respond to immune checkpoint therapy and may guide the development  
58 of novel drug combination strategies.

59

60 **Keywords:** immune landscape; immune signature; survival; invasive ductal  
61 carcinoma; immune checkpoint inhibitor

62

### 63 **Introduction**

64 Invasive ductal carcinoma (IDC) is a clinically and molecularly distinct disease.

65 IDCs are typically of high histologic grade and high mitotic index. HER2

66 overexpression or amplification is detected in 20% of these tumours (1). IDC tends to

---

67 metastasize to bone, liver, and lung, whereas invasive lobular carcinoma (ILC) has a  
68 higher tendency to metastasize in gastrointestinal and genital tracts, serosal cavities,  
69 and meninges (2). IDCs usually form glandular structures in contrast to the small  
70 clusters formed by ILCs. The loss of CDH1 leads to the discohesive morphology in  
71 ILCs, whereas IDCs maintain intact cell adhesion (3). Furthermore, the frequency of  
72 recurrently mutated genes and recurrent copy-number alterations often differs  
73 significantly between IDCs and ILCs (3). These features are generally associated with  
74 a poor prognosis. Taken together, these differences suggest that ILCs and IDCs are  
75 distinct cancer types and progress along different pathways.

76 Genetic and epigenetic changes contribute to the progression of tumour  
77 progression and recurrence in different cancer types. However, accumulated evidence  
78 indicates that the tumour microenvironment (TME) has clinicopathological  
79 significance in predicting survival outcomes and assessing therapeutic efficacy factors  
80 (4, 5). TME cells constitute a vital element of cellular and noncellular components in  
81 the tumoural niche, including extracellular matrix and cellular components, such as  
82 fibroblasts, adipose cells, immune-inflammatory cells, and neuroendocrine cells.  
83 Previous studies have revealed that immune cells in the TME modulate cancer  
84 progression and are attractive therapeutic targets (6, 7). To date, the comprehensive  
85 landscape of immune cells infiltrating the TME of IDCs has not yet been elucidated.  
86 We propose that IDCs have a distinct immune landscape and that the immune  
87 landscape might lead to different prognoses and treatment responses. In this study, by  
88 applying several computational algorithms, we estimated the abundance of immune

---

89 cells in the TME of IDCs and analysed the correlation of the immune landscape with  
90 genomic characteristics and pathological features of IDCs. Furthermore, we built an  
91 immune signature based on the TME immune phenotype, which is a robust prognostic  
92 biomarker and predictive factor for the response to immune-checkpoint inhibitors.

93

## 94 **Method**

### 95 **Data download**

96 TCGA RNA-seq datasets and clinical data for IDCs were downloaded by UCSC  
97 Xena browser (<https://xenabrowser.net/>). GSE20685 and GSE86948 were  
98 downloaded from the Gene Expression Omnibus (GEO) database.

### 99 **Implementation of Single-Sample Gene Set Enrichment Analysis (ssGSEA)**

100 We obtained the marker gene set for immune cell types from Bindea et al (8). We  
101 used the ssGSEA program to derive the enrichment scores of each immune-related  
102 term. In brief, the infiltration levels of immune cell types were quantified by ssGSEA  
103 in the R package gsva (9). The ssGSEA applies gene signatures expressed by immune  
104 cell populations to individual cancer samples. The computational approach used in  
105 our study included 24 immune cells types that are involved in innate immunity and  
106 adaptive immunity. Tumours with qualitatively different immune cell infiltration  
107 patterns were grouped using hierarchical agglomerative clustering (based on  
108 Euclidean distance and Ward's linkage).

109 The T cell infiltration score (TIS) was defined as the average of the standardized  
110 values for CD8<sup>+</sup> T, central memory CD4<sup>+</sup> T, effector memory CD4<sup>+</sup> T, central

---

111 memory CD8+ T, effector memory CD8+ T, Th1, Th2, Th17, and Treg cells. The  
112 obtained cytotoxic activity scores (CYT) score was calculated by the geometrical  
113 mean of PRF1 and GZMA (10). The CD8+ T/Treg ratio was the digital ratio of the  
114 ssGSEA scores for these two cell types. The correlation between risk score and  
115 immune cell ssGSEA score was calculated by Pearson correlation.

### 116 **LASSO regularization**

117 LASSO (least absolute shrinkage and selection operator) is an important  
118 regularization in many regression analysis methods (e.g., COX regression and logistic  
119 regression) (10). The idea behind LASSO is that an L1-norm is used to penalize the  
120 weight of the model parameters. Assuming a model has a set of parameters, the  
121 LASSO regularization can be defined as:

$$\lambda \cdot \sum_{i=0}^n \|w_i\|_1$$

122 It can also be expressed as a constraint to the targeted objective function:

$$\sum \|Y - Y^*\|_2, \quad s. t. \quad \|w_i\|_1 < t$$

123 An important property of the LASSO regularization term is that it can force the  
124 parameter values to be 0, thus generating a sparse parameter space, which is a  
125 desirable characteristic for feature selection. In our analysis, 19 genes which highly  
126 associated with OS were used as the input.

### 127 **Differentially expressed gene (DEG) analysis**

128 DEG analysis was performed by the Limma package (11). The samples were  
129 separated into a high-risk score group and a low-risk score group. An empirical

---

130 Bayesian approach was applied to estimate the gene expression changes using  
131 moderated t-tests. The Q value (adjusted p value) for multiple testing was calculated  
132 using the Benjamini-Hochberg correction. The DEGs were defined as genes with a Q  
133 value less than 0.05. The clusterProfiler R package was applied for the GO analysis  
134 (12). GSEA was applied with the GSEA software.

### 135 **Co-expression gene network based on RNA-seq data**

136 The Weighted correlation network analysis (WGCNA) was used to construct the  
137 gene co-expression network (13). The co-expression similarity  $s_{i,j}$  was defined as  
138 the absolute value of the correlation coefficient between the profiles of nodes  $i$  and  $j$ :

$$s_{i,j} = |\text{cor}(x_i, x_j)|$$

139 where  $x_i$  and  $x_j$  are expression values of for genes  $i$  and  $j$ , and  $s_{i,j}$  represent  
140 Pearson's correlation coefficients of genes  $i$  and  $j$ , respectively.

141 A weighed network adjacency was defined by raising the co-expression similarity  
142 to a power  $\beta$ :

$$a_{i,j} = s_{i,j}^\beta$$

143 with  $\beta \geq 1$ . We selected the power of  $\beta = 5$  and scale-free  $R^2 = 0.95$  as the  
144 soft-thresholding parameters to ensure a signed scale-free co-expression gene network.  
145 Briefly, network construction, module detection, feature selection, calculations of  
146 topological properties, data simulation, and visualization were performed. Modules  
147 were identified via hierarchical clustering of the weighting coefficient matrix. The  
148 module membership of node  $i$  in module  $q$  was defined as:

---

$$K_{cor,i}^{(q)} := cor(x_i, E^{(q)})$$

149 where  $x_i$  is the profile of node  $i$ , and  $E^{(q)}$  is the module eigengene (the first  
150 principal component of a given module) of module  $q$ . The module membership  
151 measure  $K_{cor,i}^{(q)}$ , lies in  $[-1, 1]$  and specifies how close node  $i$  is to module  $q$ ,  $q$   
152  $= 1, \dots, Q$ .

153 By evaluating the correlations between the immune infiltration status, immune  
154 signature of IDCs and the module membership of each module, a brown module was  
155 selected for further analysis.

## 156 **Statistical analysis**

157 A random forest algorithm was applied to find the most important somatic  
158 mutation associated with the immune signature. Survival outcome analysis modelled  
159 the results in reference to the patient OS and RFS. P-values and Hazard ratios were  
160 obtained from univariate Cox proportional-hazards regression models using the R  
161 package survival. Multivariate Cox regression was used to calculate the coefficients in  
162 the nomogram. The nomogram was plotted by the rms package. The time-dependent  
163 AUC value was calculated by the survivalROC package.

164

## 165 **Results**

### 166 **Immune Phenotype Landscape in the TME of IDC**

167 Immune cell populations modulate diverse immune responses and lead to  
168 antitumour effects by infiltrating the IDC TME. The immune cell infiltration status  
169 was assessed by applying the ssGSEA approach to the transcriptomes of IDCs.



---

170 Twenty-four immune-related terms were incorporated to deconvolve the abundance of  
171 diverse immune cell types in IDCs. The IDCs were clustered into 3 clusters (low  
172 infiltration: 208; intermediate infiltration: 430; and high infiltration: 130) in terms of  
173 immune infiltration by applying an unsupervised clustering algorithm (Fig. 1A). By  
174 applying hierarchical cluster analysis and K-means clustering analysis, we constructed  
175 a TME cell network, depicting a comprehensive landscape of tumour-immune cell  
176 interactions and their effects on the OS of patients with IDC (Figs. 1B, S1 and S2).  
177 The TME immune cells were clustered into 4 clusters, and the correlation among  
178 different immune cell types is shown in Fig. 1B. The association of OS and RFS with  
179 different clusters of IDCs was analysed by a pairwise log-rank test. The results  
180 indicated that the high infiltration group had a favourable survival probability  
181 compared with that of the low infiltration group (Fig. 1C and 1D).

### 182 **Construction of the immune signature**

183 A total of 413 genes were involved in the 24 immune-related terms. We applied  
184 the univariate COX regression based on the survival datasets of patients with IDC and  
185 the expression profiles of the 413 genes. The 19 most significant genes were selected  
186 with the criteria of a p value less than 0.0005 (Fig. 2A). The expression profiles of the  
187 19 genes are shown in Fig. 2B. LASSO Cox regression was performed on the 19  
188 genes to identify the most important features in terms of predicting the survival of  
189 IDC patients (Fig. 2C, 2D and 2E). By forcing the sum of the absolute value of the  
190 regression coefficients to be less than a fixed value, certain coefficients were reduced  
191 to exactly zero, and the most powerful prognostic features (QRSL1, TIMM8A,

---

192 IGHA1, BATF, KLRB1, SPIB, and FLT3LG) were identified with relative regression  
193 coefficients. Cross-validation was applied to prevent over-fitting. A 7-gene immune  
194 signature was constructed according to the individual coefficients of the genes. Then,  
195 we calculated the risk score for each IDC patient and ranked them (Fig. 2F). Fig. 2G  
196 shows the survival overview in the IDC patients. A heatmap showed that patients in  
197 the high-risk group tended to have increased QRSL1 and TIMM8A expression levels,  
198 as well as decreased expression levels of IGHA1, BATF, KLRB1, SPIB, and FLT3LG  
199 (Fig. 2G). The Kaplan-Meier curve and Cox regression suggested that patients with  
200 high risk scores had significantly worse OS and RFS than those with low risk scores  
201 (HR=2.94,  $p<0.0001$  and HR=2.28,  $p=0.001$ , respectively) (Fig. 2H and 2I). The  
202 effect of the 7 genes on the OS and RFS of IDC patients is shown in Fig. S3 and Fig.  
203 S4, respectively. To confirm our findings in the IDC cohort, we validated the  
204 prognostic function of the immune signature in two independent GEO cohorts  
205 (GSE20685 and GSE86948). The risk score was calculated for each patient by using  
206 the same formula as in the IDC cohort. The GSE20685 and GSE86948 cohorts were  
207 used to predict the OS of BRCA patients based on our immune signature model.  
208 Consistent with our previous findings, the Kaplan-Meier curve suggested a  
209 significantly better overall survival in the low-risk group than in the high-risk group  
210 (Fig. S5A and S5B).

211 **The low risk score was associated with active infiltration status and high**  
212 **cytotoxic potential**

213 High infiltration status showed a lower risk score than the intermediate

---

214 infiltration status and low infiltration status showed (Fig. 3A). Similarly, patients with  
215 a low risk score had a higher proportion of high immune infiltration than patients with  
216 a high risk score (Fig. 3B). The presence of high immune infiltration in patients was  
217 linked to a low risk score and was associated with a favourable outcome (Fig. 3C). To  
218 compare cytotoxic function with the immune landscape and immune signature that we  
219 constructed, the associated signatures were identified for each patient. IDCs with high  
220 infiltration status and low risk score were associated with increased levels of immune  
221 activation. The TIS ( $p < 0.0001$  and  $p < 0.0001$ , respectively) (Fig. 3D and 3H),  
222 interferon- $\gamma$  signature ( $p < 0.0001$  and  $p < 0.0001$ , respectively) (Fig. 3E and 3I), and  
223 CYT ( $p < 0.0001$  and  $p < 0.0001$ , respectively) (Fig. 3F and 3J) were increased in the  
224 low-risk score group and high infiltration group. The ssGSEA score of DCs was  
225 higher in the low-risk score group than in the high-risk score group. The  
226 Kaplan-Meier curve showed that in the low-risk score group, the ssGSEA score of DC  
227 cells affected survival but did not affect the high-risk score group (Fig. S6A, S6B and  
228 S6C). These data indicate that compared with high-risk score tumours, low-risk score  
229 tumours have a distinct immune phenotype, characterized by increased immune  
230 infiltration and increased levels of immune activation.

### 231 **The low-risk score was associated with increased T cell infiltration**

232 The association of risk score and immune-related cells was analysed by Pearson  
233 correlation. Cytotoxic cells, CD8+ T cells, T cells and the 6 other most significant  
234 immune-related cell types are shown in Fig. 4. A high level of correlation was found  
235 between the risk score and the T cell-mediated immune response. The ssGSEA scores

---

236 of 24 immune-related terms in the low, intermediate, and high immune status and  
237 low- and high-risk score groups are shown in Fig. S7A and S7C. The p value and  
238 difference in the mean ssGSEA score from the high- and low-infiltration status and  
239 low- and high-risk score groups are shown in Fig. S7B and Fig. S7D. The proportions  
240 of low, intermediate, and high immune infiltration status in different pathological  
241 subtypes and different AJCC stages of IDC are shown in Fig. S7E and Fig. S7F. The  
242 triple-negative subtype of IDCs had a higher proportion of high infiltration status  
243 IDCs than other pathological subtypes, indicating an active immune response in  
244 triple-negative IDCs. The risk score distribution in different pathological subtypes and  
245 different AJCC stages of IDC are shown in Fig. S5G and Fig. S5H. The luminal A  
246 subtype had a lower risk score than the other pathological subtypes.

#### 247 **Functional annotation and WGNCA of the transcriptomes of IDC patients**

248 To identify the underlying biological characteristics of the constructed immune  
249 signature, DEG analysis was performed based on the high-risk score group and  
250 low-risk score group. The heatmap depicts the significant DEGs between the two  
251 groups (Fig. 5A). The GO analysis indicated that T cell activation, positive regulation  
252 of leukocyte cell-cell adhesion, and regulation of lymphocyte activation were the most  
253 significantly enriched biological processes between the high-risk score group and the  
254 low-risk score group (Fig. 5B). The GSEA results showed that allograft rejection,  
255 IL-6/JAK/STAT3 signalling, the inflammatory response, interferon- $\alpha$  response,  
256 interferon- $\gamma$  response and TNF- $\alpha$  signalling via the NF $\kappa$ B pathway were the  
257 predominant upregulated pathways in the low-risk score group. In contrast, the E2F

---

258 targets, G2M checkpoints, MTORC1 signalling and protein secretion pathways were  
259 significantly downregulated in the low-risk score group (Fig. 5C and 5D). To further  
260 identify the underlying biological characteristics in the immune signature, WGCNA  
261 was performed, and the correlation of risk score and immune infiltration status with  
262 module membership was analysed. The soft threshold selection is shown in Fig. S8.  
263 The module-trait heatmap illustrates that the brown module had a significant p value  
264 with both immune signature and immune infiltration status (Fig. 5E); the coefficients  
265 were -0.64 and 0.8, respectively. The association between module membership and  
266 gene significance for each gene in the brown module is shown in Fig. 5F. The genes  
267 from the brown module with a coefficient greater than 0.5 were selected as hub genes,  
268 and GO enrichment analysis revealed that T cell activation and lymphocyte activation  
269 were the most significantly enriched biological processes, which further confirmed  
270 the results from the DEG analysis.

### 271 **Mutation load and immune signature**

272 The spectrum of somatic mutations in patients with IDCs is known to be varied.  
273 We next investigated the distributions of somatic mutations and observed different  
274 patterns among IDCs in terms of total mutation burden (TMB). The risk score from  
275 the immune signature had a positive correlation with TMB in IDC patients (Fig. 6A).  
276 By applying a random forest algorithm, we identified 35 highly variable mutated  
277 genes that were associated with the immune signature (Fig. 6B). TP53 was the  
278 predominant gene of the 35 identified genes.

### 279 **Construction of a nomogram to predict overall survival in IDC patients**

---

280 We constructed a nomogram that integrated clinicopathological features with the  
281 immune signature to predict the survival probability of IDC patients (Fig. 7A). The  
282 AUC(t) functions of the multivariable models were developed to indicate how well  
283 these features serve as prognostic markers. Compared to other features, such as  
284 signature-based risk score, AJCC-TNM stage and total mutation burden, the  
285 nomogram consistently showed the highest predictive power for overall survival in  
286 the follow-up period (Fig. 7B).

287 **The immune signature predicted the immunotherapeutic benefits in IDC patients**

288 VEGF-A, the main mediator in tumour angiogenesis, hinders T cell infiltration in  
289 the tumour microenvironment. Hence, we explored the correlation between VEGF-A  
290 expression and the T cell immune response in IDC tumours. Interestingly, the  
291 increased VEGFA expression significantly correlated with both decreased levels of  
292 activated CD8<sup>+</sup> T cells and Th1 cell infiltration in the high immune infiltration  
293 tumour microenvironment but not in the low immune infiltration tumour  
294 microenvironment (Fig. 8A and 8B). Furthermore, perforin, the molecular effector  
295 found in the granules of cytotoxic T lymphocytes and natural killer cells, also showed  
296 a negative correlation with VEGF-A expression (Fig. 8C). Finally, the positive  
297 correlation of VEGF-A and the risk score was identified. PD-1, PDL-1 and cytotoxic  
298 T lymphocyte antigen-4 (CTLA-4) are promising targets for the treatment of patients  
299 with breast and non-small cell lung cancer. PD-1, PDL-1, and CTLA-4 antibodies are  
300 undergoing studies for the treatment of breast cancer. We analysed the correlation of  
301 PD-1, PDL-1, and CTLA-4 expression in the high- and low-infiltration groups. The

---

302 expression of PD-1, PDL-1, and CTLA-4 was more significantly correlated with  
303 CD8<sup>+</sup> T cells, Th1 cell ssGSEA score and perforin expression in the high-infiltration  
304 group than in the low-infiltration group. Furthermore, the mean expression of PD-1,  
305 PDL-1, and CTLA-4 was significantly increased in the high-infiltration group,  
306 indicating a potentially enhanced response to the corresponding anticancer antibody  
307 for IDCs with high immune infiltration status. In our constructed immune signature,  
308 the risk score showed a negative correlation with PD-1, PDL-1, and CTLA-4  
309 expression, which implies a potentially enhanced effect of PD-1, PDL-1, and CTLA-4  
310 antibodies in patients with low risk score. Lastly, we checked the correlation of the  
311 expression profiles of several immune checkpoint proteins, e.g., CD160, CD274,  
312 CD276, CTLA-4, LAG3, and PDCD1, risk score, and VEGF-A in the TCGA and  
313 GSE20685 cohorts (Fig. S8).

314

## 315 **Discussion**

316 In this study, we depicted the immune landscape of IDC using a large cohort. The  
317 immune landscape might explain the differences in prognoses of patients with IDC  
318 and responses to PD1, PDL-1 and CTLA-4 antibodies. Based on the immune  
319 landscape, we constructed an immune signature that calculated the risk score per  
320 patient. The correlation of signature and immune landscape revealed that the T  
321 cell-mediated immune response played a crucial role in the signature. Patients with  
322 low risk scores had increased T cell infiltration scores, interferon- $\gamma$  signatures, and  
323 cytotoxic activity scores, indicating active T cell immune responses and favourable

---

324 survival probability. A random forest algorithm was applied to find the most important  
325 somatic mutation correlated with the immune signature. A nomogram was constructed  
326 based on the immune signature and other clinicopathological properties of IDCs. A  
327 time-dependent ROC analysis showed high accuracy of the immune signature and  
328 nomogram in terms of predicting the survival of IDC patients. Lastly, PD-1, PDL-1,  
329 and CTLA-4 expression was found to be highly associated with the risk score. The  
330 patients with low risk scores had increased expression levels of PD-1, PDL-1, and  
331 CTLA-4, indicating a potentially high response rate to PD-1, PDL-1, and CTLA-4  
332 antibodies.

333 In our analysis, the IDCs were clustered into three main clusters (low immune  
334 infiltration, intermediate immune infiltration, and high immune infiltration). The  
335 patients in the high-infiltration cluster had the best survival probability compared with  
336 patients in the low- and intermediate-infiltration clusters. The T cell immune response  
337 is the central event in antitumour immunity (14). T cells are divided into CD4+  
338 (helper T cells, Th) and CD8+ (cytotoxic T cells, Tc) T cells. Their secretomes include  
339 IFN- $\gamma$ , TNF- $\alpha$ , and IL17, which have antitumour effects. Hence, the increased T cell  
340 infiltration score, interferon- $\gamma$  signature, and cytotoxic activity score may lead to an  
341 anti-tumour effect in the high-infiltration group. This finding could explain the  
342 different OS and RFS in the high- and low-infiltration groups.

343 From the immune landscape in IDCs, we built an immune signature that included  
344 seven features (QRSL1, TIMM8A, IGHA1, BATF, KLRB1, SPIB, and FLT3LG).  
345 FLT3LG is a crucial cytokine that controls the development of DCs and is particularly



---

346 important for CD8-positive classical DCs and their CD103-positive tissue  
347 counterparts. A clinical trial is currently underway to treat melanoma patients with a  
348 combination of immunostimulatory FLT3LG and a peptide-based vaccine targeting  
349 DCs (15). KLRB1, which encodes CD161, a surface marker on several T cell subsets  
350 and NK cells, has been found to be most frequently associated with favourable  
351 outcomes in many cancer types by enhancing innate immune characteristics (16).  
352 SPIB is a member of the ETS family and profoundly affects B cell functions. B cells  
353 that lack SPIB fail to proliferate in response to IgM cross-linking, exhibit limited  
354 capacity to respond to T-dependent antigens, and produce low levels of IgG1, IgG2a,  
355 and IgG2b (17). In addition, SPIB can activate enhancer elements in both Ig- $\lambda$  and  
356 Ig- $\kappa$  genes, increasing the expression of these two genes. BATF is an inhibitor of  
357 AP-1-driven transcription. Recent studies have revealed that BATF can regulate  
358 positive transcriptional activity in dendritic cells, B cells and T cells (18). BATF  
359 leucine zipper motifs interact with interferon-regulatory factor 4 (IRF4) and IRF8 at  
360 AP-1–IRF consensus elements (AICEs), adding additional flexibility to the actions of  
361 IRF4 and IRF8, which were previously considered to interact with SPIB and PU.1  
362 (19). The interaction of IRF4 and BATF in T helper 17 cells increases the  
363 production of IL-17, IL-21, IL-22 and IL-23 receptor. TIMM8A is involved in the  
364 import and insertion of hydrophobic membrane proteins from the cytoplasm to the  
365 mitochondrial inner membrane. The Bax/Bak complex mediates the release of  
366 DDP/TIMM8a and activates Drp1-mediated fission to promote mitochondrial  
367 fragmentation and subsequent elimination during programmed cell death (20).

---

368 From the expression profiles of the seven genes above, we calculated the risk score  
369 for each patient and predicted the survival of IDC patients.

370 The risk score from the immune signature was most significantly correlated with  
371 the ssGSEA score of cytotoxic cells, CD8 T cells and T cells, indicating the important  
372 roles of the T cell immune response in the immune signature. Interestingly, DCs in the  
373 low-risk group played a more important role than DCs in the high-risk group. The  
374 increased proportion of DCs significantly correlated with favourable survival in the  
375 low-risk group but did not correlate with favourable survival of patients in the  
376 high-risk group. Th innate inflammatory cytokines, such as IL-1, IL-12, and IL-23  
377 expressed by DCs, promote IFN- $\gamma$ -secreting CD4<sup>+</sup> T cell and cytotoxic T lymphocyte  
378 responses (21). The high proportion of DCs and T cells cooperate to achieve the  
379 antitumour effect in IDC patients with low risk scores. Furthermore, the GSEA results  
380 revealed high levels of IFN- $\gamma$ , TNF- $\alpha$ , and TNF- $\alpha$  secretion in the low-risk group,  
381 which contribute to the antitumour activity in IDC patients with low risk scores.  
382 WGCNA revealed opposing directions of the risk score ( $cor = -0.64$ ) and immune  
383 infiltration ( $cor = 0.8$ ) with the brown module, indicating the high level of correlation  
384 of risk score (calculated by immune signature) and immune infiltration. The hub gene  
385 in the brown module plays an essential role in regulating immune infiltration. The GO  
386 analysis revealed that T cell activation was the most significantly enriched biological  
387 process, indicating that the T cell-mediated immune response is the central event in  
388 both immune infiltration and the immune signature.

389 The spectrum of somatic mutations varied in IDC patients. The different mutation

---

390 burdens in IDCs led us to analyse whether the landscape of immune cells and the  
391 immune signature were associated with somatic mutations. The TMB showed a  
392 positive correlation with the risk score in IDC patients. Furthermore, a random forest  
393 algorithm was performed to identify the most important variables correlated with the  
394 immune signature. TP53, SCN10A, PIK3CA and 32 other genes were the most  
395 significant variables in the analysis. TP53 and PIK3CA mutations are the most  
396 common gene mutations in IDCs (44% and 33%, respectively). In the 35 gene  
397 variables, GATA3, a key regulator of ER activity, is a newly identified gene that is  
398 mutated in IDCs (5% in ILC versus 13% in IDC,  $q = 0.03$ ) (3). Mutations in GATA3  
399 are more frequent in luminal A IDC and are mutually exclusive with FOXA1 events.  
400 The differential expression level and enrichment for mutations of GATA3 in IDCs and  
401 of FOXA1 in ILC indicates a preferential requirement for the distinct regulation of  
402 ER activity in ILC and IDC (3). Previous studies revealed that the GATA3 mutation  
403 correlates with increased expression, which is associated with the immune response  
404 (22, 23). Our analysis further confirms the correlation of the GATA3 mutation with  
405 immune infiltration. In addition, we constructed a nomogram that integrated  
406 clinicopathological features with the immune signature to predict the survival  
407 probability of IDC patients. Compared with other clinicopathological features, the  
408 immune signature showed the best accuracy in predicting the survival of IDC patients  
409 at any time point and would therefore be helpful for the diagnosis and precise  
410 treatment of IDC patients.

411 There have been several studies for the treatment of breast cancer with

---

412 immunotherapeutic antibodies. PD-1 is expressed by exhausted T cells. PD-1 and  
413 PD-L1 exhibit inhibitory receptor–ligand interactions, which are involved in the  
414 negative regulation of T cell activation and peripheral tolerance during immune  
415 responses by cancer cells. Despite demonstrated successes, only a proportion of  
416 patients benefit from PD-1 and PDL-1 antibody treatment. Hence, it is important to  
417 determine the mechanism that leads to the varied therapeutic effect of PD-1 and  
418 PDL-1 antibody treatment and thus improve individual diagnosis and precision  
419 medicine. PD-L1 expression, microsatellite instability and deficient mismatch repair  
420 are important biomarkers that predict the response to anti-PD-1/PD-L1 therapies  
421 (24-26). Among the three biomarkers, PD-L1 expression has been validated in nearly  
422 all tumour types for all approved anti-PD-1/PD-L1 therapies. In our analysis, the  
423 expression of PD1, PDL-1, and CTLA-4 was significantly increased in the  
424 high-infiltration group. Furthermore, the expression of PD1, PDL-1, and CTLA-4 had  
425 a significant correlation with CD8+ T cells, Th1 cell ssGSEA score and perforin  
426 expression in the high-infiltration group, which provides a basis for PD-1/PD-L1 and  
427 CTLA-4 treatment. Similarly, the immune signature we constructed also indicated that  
428 high expression levels of PD1, PDL-1, and CTLA-4 correlated with low risk score.  
429 Therefore, patients with a low risk score could derive more benefit from  
430 immunotherapy than patients with a high risk score.

431 In the current study, we performed a comprehensive evaluation of the immune  
432 landscape of IDC and constructed an immune signature related to the immune  
433 landscape. This analysis of TME immune infiltration patterns has shed light on how

---

434 IDC respond to immune checkpoint therapy and may guide the development of novel  
435 drug combination strategies.

436

437 **List of abbreviations**

438 TME: tumour microenvironment; IDC: invasive ductal carcinoma; TCGA: The  
439 Cancer Genome Atlas; GEO: Gene Expression Omnibus; ssGSEA: single-sample  
440 gene set enrichment; LASSO: least absolute shrinkage and selection operator; ILC:  
441 invasive lobular carcinoma; DEG: differentially expressed gene; WGCNA: weighted  
442 correlation network analysis; TMB: total mutation burden; IRF4:  
443 interferon-regulatory factor 4; AICE: AP-1–IRF consensus element.

444

445 **Declarations**

446 **Ethics approval and consent to participate**

447 Not applicable

448 **Consent for publication**

449 Not applicable

450 **Availability of data and materials**

451 The datasets supporting the conclusions of this article are available in the Xena  
452 browser (<https://xenabrowser.net/>) repository.

453 **Competing interests**

454 The authors declare that they have no competing interests.

---

455 **Funding**

456 This work was partially supported by the Zhejiang Provincial Natural Science  
457 Foundation (NO. LY16H020005).

458 **Author Contributions**

459 XW. B. and R. S. conceived and designed the experiments. XW. B., S. X., and K.  
460 Z. analysed the data. XW. B., and YF. W. wrote the paper. YB. Z., K. Z., and R. S.  
461 reviewed the draft. All authors read and approved the final manuscript.

462 **Acknowledgements**

463 We would like to thank Dr Michael Rosemann for helpful discussions and  
464 suggestions.

465

466

467 **Figure legends**

468 **Fig. 1 Immune landscape of IDCs and the TME characteristics.**

469 A, Unsupervised clustering of IDC patients from the TCGA cohort using ssGSEA  
470 scores from immune cell types. Mutation status of TP53, MYC, GATA3, MAP2K4,  
471 and CDH1, status of the oestrogen receptor, status of the progesterone receptor, status  
472 of Her2, survival, and stage are shown as patient annotations in the lower panel.  
473 Hierarchical clustering was performed with Euclidean distance and Ward linkage.  
474 Three distinct immune infiltration clusters, here termed high infiltration, median  
475 infiltration, and low infiltration, were defined. B, Interaction of the TME immune cell

---

476 types. The size of each term represents the survival impact of each TME cell type,  
477 calculated by  $\log_{10}$  (log-rank test P value). The connection of TME immune cells  
478 represents interactions between both. The thickness of the line indicates the strength  
479 of the correlation calculated by Spearman correlation analysis. Positive correlations  
480 are represented in red, and negative correlations are represented in blue. The immune  
481 cell cluster was clustered by the hclust method. Immune cell cluster-A, yellow; cell  
482 cluster-B, blue; cell cluster-C, red; and cell cluster-D, brown. C, Kaplan-Meier curves  
483 for OS of IDC patients showing that the high immune infiltration group had a  
484 favourable outcome compared with the other groups. D, Kaplan-Meier curves for RFS  
485 of IDC patients showing that the high immune infiltration group had a favourable  
486 outcome compared with other groups. IDC: invasive ductal carcinoma; TME: tumour  
487 microenvironment; TCGA: The Cancer Genome Atlas; OS: overall survival; and RFS:  
488 recurrence-free survival.

489 **Fig. 2 Signature-based risk score is a promising marker of survival in IDC**  
490 **patients.**

491 A, The HR and P value from the univariable Cox HR regression of selected genes in  
492 the immune terms (Criteria: P value < 0.001). B, The expression of the selected genes  
493 shown by heatmap. Mutation status of TP53, MYC, GATA3, MAP2K4, and CDH1,  
494 status of the oestrogen receptor, status of the progesterone receptor, status of Her2,  
495 survival, and stage are shown as patient annotations in the lower panel. Hierarchical  
496 clustering was performed with Euclidean distance and Ward linkage. C and D,  
497 LASSO Cox analysis identified 7 genes most correlated with overall survival, and

---

498 10-round cross validation was performed to prevent overfitting. E, Coefficient  
499 distribution of the gene signature. F, Risk score distribution. G, Survival overview. H,  
500 Heatmap showing the expression profiles of the signature in the low- and high-risk  
501 groups. I, Patients in the high-risk group exhibited worse OS than those in the  
502 low-risk group. J, Patients in the high-risk group exhibited worse RFS than those in  
503 the low-risk group. IDC: invasive ductal carcinoma; OS: overall survival; and RFS:  
504 recurrence-free survival.

505 **Fig. 3 Heterogeneous immune cell infiltration in the low- and high-risk score**  
506 **groups.**

507 A, The distribution of risk scores in low, mediate and high immune infiltration  
508 patterns. B, The distribution of immune infiltration patterns in the low- and high-risk  
509 score groups. C, Alluvial diagram of immune infiltration patterns in groups with  
510 different risk scores and survival outcomes. D, TIS in low, mediate and high immune  
511 infiltration patterns. E, Relative interferon- $\gamma$  signature in low, mediate and high  
512 immune infiltration patterns. F, Comparison of relative CYT in low, mediate and high  
513 immune infiltration patterns. G, Relative TIS in the low- and high-risk score groups. E,  
514 Relative interferon- $\gamma$  signature in the low- and high-risk score groups. F, Comparison  
515 of relative CYT in the low- and high-risk score groups. TIS: T cell infiltration score;  
516 CYT: cytotoxic activity scores.

517 **Fig. 4 The nine most significant correlations of risk score with immune cell**  
518 **infiltration ssGSEA score.**

519 **Fig. 5 Functional annotation of the immune signature and WGCNA of the IDC**



---

520 **transcriptome.**

521 A, Heatmap showing the transcriptome expression profiles of the low- and high-risk  
522 groups. B, GO analysis based on the significant genes in the comparison between  
523 low- and high-risk groups. C and D, GSEA revealed that most significant hallmarks  
524 correlated with the immune signature. E, Correlation between modules and traits. G,  
525 The correlation between module membership and gene significance in the brown  
526 module. H, GO analysis based on the hub genes in the brown module. GO: gene  
527 ontology; GSEA: gene set enrichment analysis.

528 **Fig. 6 The association of the immune signature with cancer somatic mutations.**

529 A, The correlation between the immune signature and IDC somatic mutations. B,  
530 Distribution of somatic mutations correlated with the immune signature. The upper  
531 bar plot indicates OS and RFS per patient, whereas the left bar plot shows the  
532 importance of the somatic mutations correlated with the immune signature. IDC:  
533 invasive ductal carcinoma; OS: overall survival; and RFS: recurrence-free survival.

534 **Fig. 7 Construction of a nomogram for survival prediction.**

535 A, Nomogram combining the immune signature with clinicopathological features. B,  
536 The AUC(t) of the multivariable models indicated that the nomogram had the highest  
537 predictive power for overall survival.

538 **Fig. 8 Immune signature predicts immunotherapeutic benefits**

539 A, B and C, The correlation of VEGFA expression with T cell infiltration, Th1 cells  
540 and PRF1 expression in high and low immune infiltration conditions. D, The  
541 correlation of VEGFA expression with the immune signature. E, F and G, The

---

542 correlation of PD-1 expression with T cell infiltration, Th1 cells and PRF1 expression  
543 in high and low immune infiltration conditions. H, The correlation of PD-1 expression  
544 with the immune signature. I, J and K, The correlation of PDL-1 expression with T  
545 cell infiltration, Th1 cells and PRF1 expression in high and low immune infiltration  
546 conditions. L, The correlation of PDL-1 expression with the immune signature. M, N  
547 and O, The correlation of CTLA-4 expression with T cell infiltration, Th1 cells and  
548 PRF1 expression in high and low immune infiltration conditions. P, The correlation of  
549 CTLA-4 expression with the immune signature.

550 **Fig. S1 The correlation between different infiltrating immune cells.**

551 **Fig. S2 The correlation between the ssGSEA scores of infiltrating immune cells**  
552 **and the OS probability of IDC patients.**

553 **Fig. S3 The correlation between the expression level of seven genes in the**  
554 **immune signature and the OS probability of IDC patients.**

555 **Fig. S4 The correlation between the expression of seven genes in the immune**  
556 **signature and the RFS probability of IDC patients.**

557 **Fig. S5 Validation of the immune signature in two external cohorts, GSE20685 (A)**  
558 **and GSE86948 (B).**

559 **Fig. S6 The correlation between the ssGSEA scores of DCs and the OS**  
560 **probability of IDC patients in the high- and low-risk score groups.**

561 A, The ssGSEA scores were higher in the high- and low-risk score groups. B, The  
562 correlation between the ssGSEA scores of DCs and the OS probability of IDC patients  
563 in the low-risk score group. C, The correlation between the ssGSEA scores of DCs

---

564 and the OS probability of IDC patients in the high-risk score group.

565 **Fig. S7 The ssGSEA score distribution in the low, intermediate and high immune**  
566 **infiltration patterns and in the low- and high-risk score groups.**

567 A, The ssGSEA score distribution in low, intermediate and high immune infiltration  
568 patterns. B, The difference and P value from the comparison between the ssGSEA  
569 score from low and high immune infiltration patterns. C, The ssGSEA score  
570 distribution in the low- and high-risk score groups. D, The difference and P value  
571 from the comparison between the ssGSEA score from the low- and high-risk score  
572 group. E, The distribution of immune infiltration patterns in different pathological  
573 subtypes. F, The distribution of risk scores in different pathological subtypes. G, The  
574 distribution of immune infiltration patterns at different pathological stages. H, The  
575 distribution of risk scores at different pathological stages.

576 **Fig. S8 The selection of the soft threshold in the WGCNA**

577 **Fig. S9 The correlation of the expression profiles of several immune checkpoint**  
578 **proteins, risk score, and VEGF-A in the TCGA (A) cohort and GSE20685 cohort**  
579 **(B).**

580

581

## 582 **References**

583 1. Eble JN, Tavassoli FA, Devilee P. Pathology and genetics of tumours of the breast and female  
584 genital organs: Iarc; 2003.

585 2. Arpino G, Bardou VJ, Clark GM, Elledge RM. Infiltrating lobular carcinoma of the breast: tumor

- 
- 586 characteristics and clinical outcome. *Breast cancer research*. 2004;6(3):R149.
- 587 3. Ciriello G, Gatza ML, Beck AH, Wilkerson MD, Rhie SK, Pastore A, et al. Comprehensive molecular  
588 portraits of invasive lobular breast cancer. *Cell*. 2015;163(2):506-19.
- 589 4. Smid M, Rodríguez-González FG, Sieuwerts AM, Salgado R, Prager-Van der Smissen WJ, van Der  
590 Vlugt-Daane M, et al. Breast cancer genome and transcriptome integration implicates specific  
591 mutational signatures with immune cell infiltration. *Nature communications*. 2016;7:12910.
- 592 5. Pages F, Galon J, Dieu-Nosjean M, Tartour E, Sautès-Fridman C, Fridman W. Immune infiltration in  
593 human tumors: a prognostic factor that should not be ignored. *Oncogene*. 2010;29(8):1093.
- 594 6. Keir ME, Butte MJ, Freeman GJ, Sharpe AH. PD-1 and its ligands in tolerance and immunity. *Annu*  
595 *Rev Immunol*. 2008;26:677-704.
- 596 7. Le DT, Uram JN, Wang H, Bartlett BR, Kemberling H, Eyring AD, et al. PD-1 blockade in tumors  
597 with mismatch-repair deficiency. *New England Journal of Medicine*. 2015;372(26):2509-20.
- 598 8. Bindea G, Mlecnik B, Tosolini M, Kirilovsky A, Waldner M, Obenauf AC, et al. Spatiotemporal  
599 dynamics of intratumoral immune cells reveal the immune landscape in human cancer. *Immunity*.  
600 2013;39(4):782-95.
- 601 9. Hänzelmann S, Castelo R, Guinney J. GSVA: gene set variation analysis for microarray and  
602 RNA-seq data. *BMC bioinformatics*. 2013;14(1):7.
- 603 10. Rooney MS, Shukla SA, Wu CJ, Getz G, Hacohen N. Molecular and genetic properties of tumors  
604 associated with local immune cytolytic activity. *Cell*. 2015;160(1-2):48-61.
- 605 11. Smyth GK. *Limma: linear models for microarray data*. *Bioinformatics and computational biology*  
606 *solutions using R and Bioconductor*: Springer; 2005. p. 397-420.
- 607 12. Yu G, Wang L-G, Han Y, He Q-Y. *clusterProfiler: an R package for comparing biological themes*

- 
- 608 among gene clusters. *OmicS: a journal of integrative biology*. 2012;16(5):284-7.
- 609 13. Langfelder P, Horvath S. WGCNA: an R package for weighted correlation network analysis. *BMC*  
610 *bioinformatics*. 2008;9(1):559.
- 611 14. Baeuerle PA, Reinhardt C. Bispecific T-cell engaging antibodies for cancer therapy. *Cancer*  
612 *research*. 2009;69(12):4941-4.
- 613 15. Vacchelli E, Aranda F, Bloy N, Buqué A, Cremer I, Eggermont A, et al. Trial  
614 Watch—Immunostimulation with cytokines in cancer therapy. *Oncoimmunology*. 2016;5(2):e1115942.
- 615 16. Gentles AJ, Newman AM, Liu CL, Bratman SV, Feng W, Kim D, et al. The prognostic landscape of  
616 genes and infiltrating immune cells across human cancers. *Nature medicine*. 2015;21(8):938.
- 617 17. Gallant S, Gilkeson G. ETS transcription factors and regulation of immunity. *Archivum*  
618 *immunologiae et therapiae experimentalis*. 2006;54(3):149-63.
- 619 18. Murphy TL, Tussiwand R, Murphy KM. Specificity through cooperation: BATF–IRF interactions  
620 control immune-regulatory networks. *Nature reviews immunology*. 2013;13(7):499.
- 621 19. Li P, Spolski R, Liao W, Wang L, Murphy TL, Murphy KM, et al. BATF–JUN is critical for  
622 IRF4-mediated transcription in T cells. *Nature*. 2012;490(7421):543.
- 623 20. Arnoult D, Rismanchi N, Grodet A, Roberts RG, Seeburg DP, Estaquier J, et al. Bax/Bak-dependent  
624 release of DDP/TIMM8a promotes Drp1-mediated mitochondrial fission and mitoptosis during  
625 programmed cell death. *Current Biology*. 2005;15(23):2112-8.
- 626 21. Butt A, Mills K. Immunosuppressive networks and checkpoints controlling antitumor immunity  
627 and their blockade in the development of cancer immunotherapeutics and vaccines. *Oncogene*.  
628 2014;33(38):4623.
- 629 22. Usary J, Llaca V, Karaca G, Presswala S, Karaca M, He X, et al. Mutation of GATA3 in human breast

---

630 tumors. *Oncogene*. 2004;23(46):7669.

631 23. Mantel P-Y, Kuipers H, Boyman O, Rhyner C, Ouaked N, Rückert B, et al. GATA3-driven TH2

632 responses inhibit TGF- $\beta$ 1-induced FOXP3 expression and the formation of regulatory T cells. *PLoS*

633 *biology*. 2007;5(12):e329.

634 24. Lee V, Le DT. Efficacy of PD-1 blockade in tumors with MMR deficiency. *Future Medicine*; 2016.

635 25. Diaz LA, Marabelle A, Delord J-P, Shapira-Frommer R, Geva R, Peled N, et al. Pembrolizumab

636 therapy for microsatellite instability high (MSI-H) colorectal cancer (CRC) and non-CRC. *American*

637 *Society of Clinical Oncology*; 2017.

638 26. Topalian SL, Hodi FS, Brahmer JR, Gettinger SN, Smith DC, McDermott DF, et al. Safety, activity,

639 and immune correlates of anti-PD-1 antibody in cancer. *New England Journal of Medicine*.

640 2012;366(26):2443-54.

641

642

A

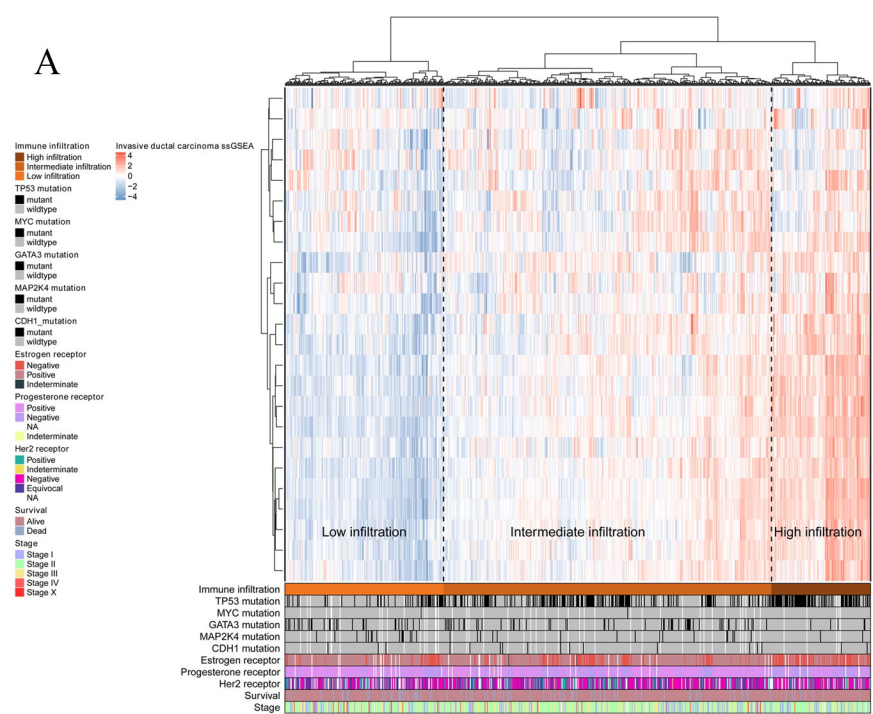

B

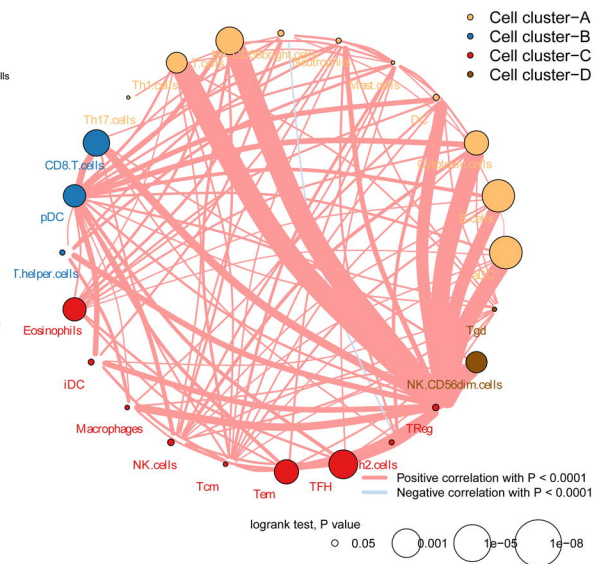

C

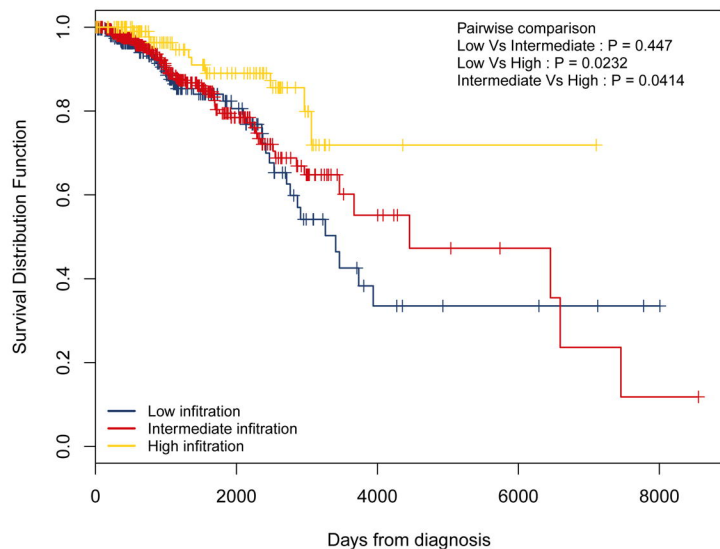

D

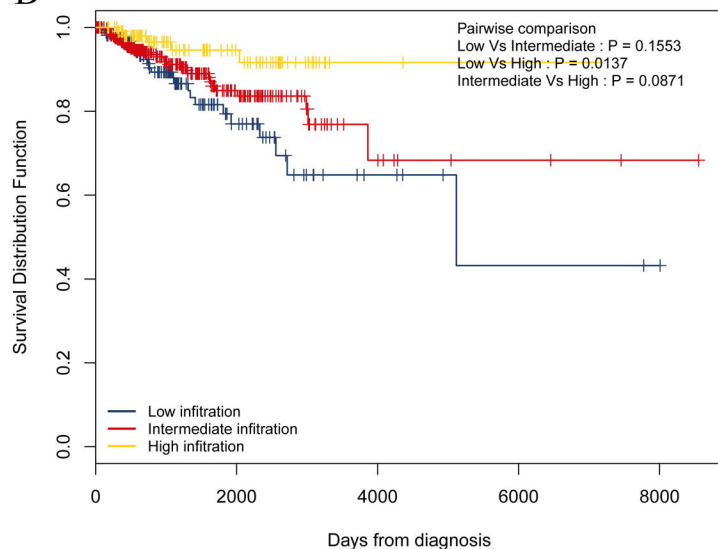

A

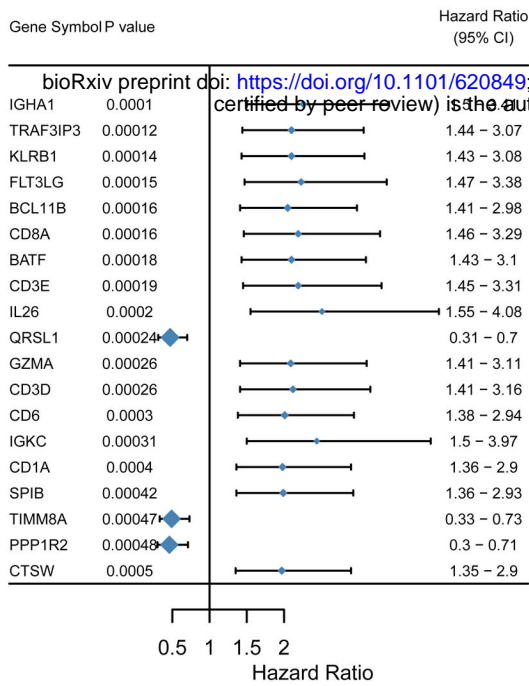

B

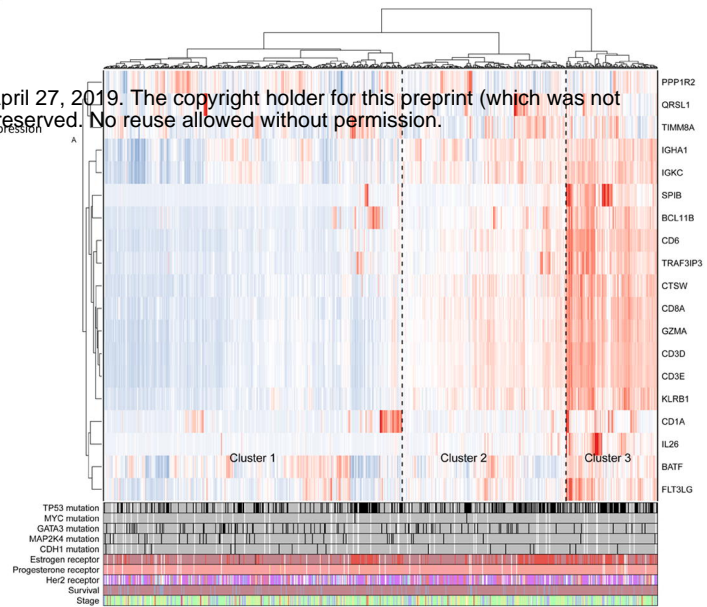

C

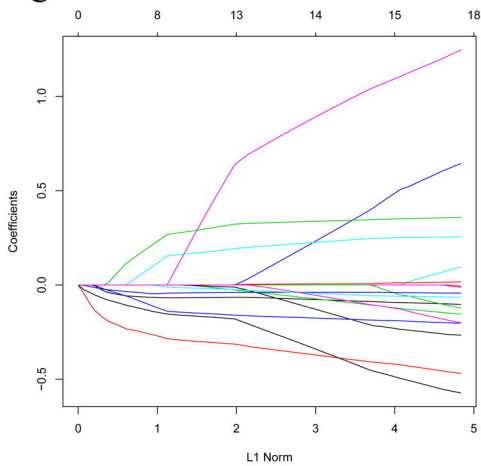

D

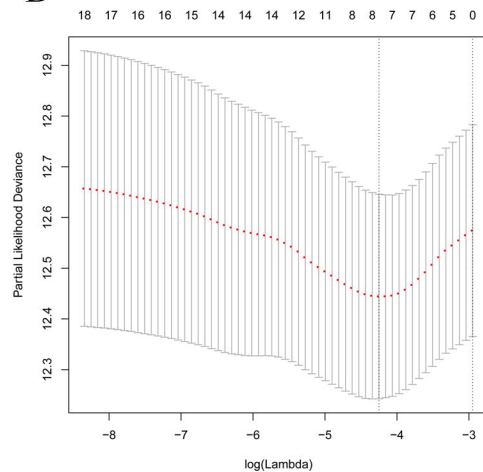

E

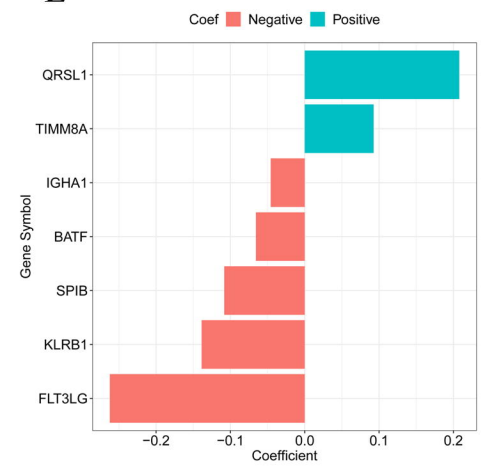

F

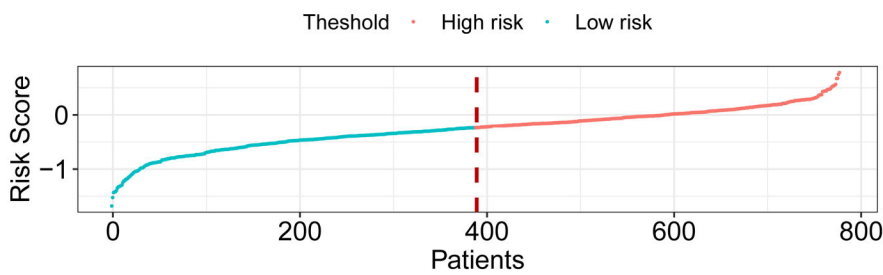

G

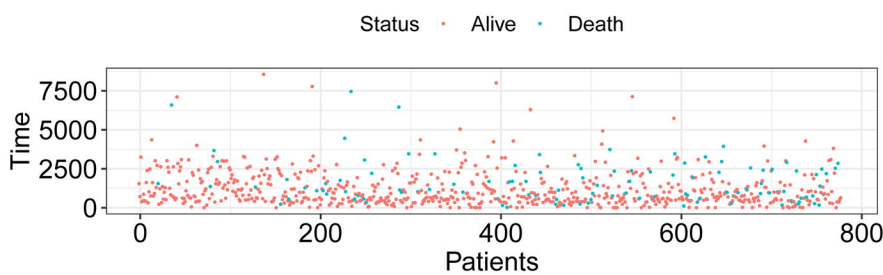

H

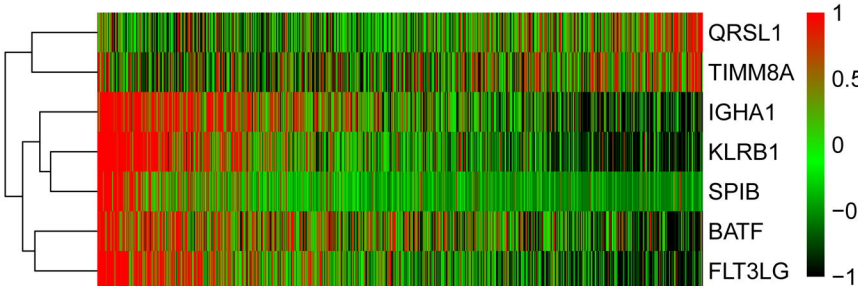

I

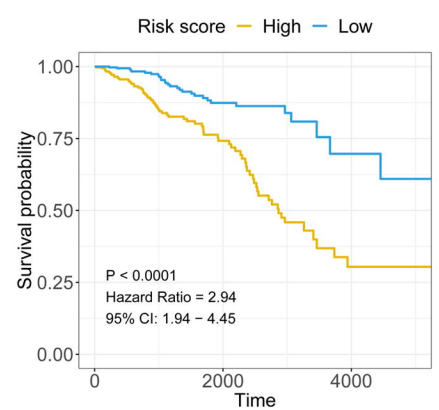

J

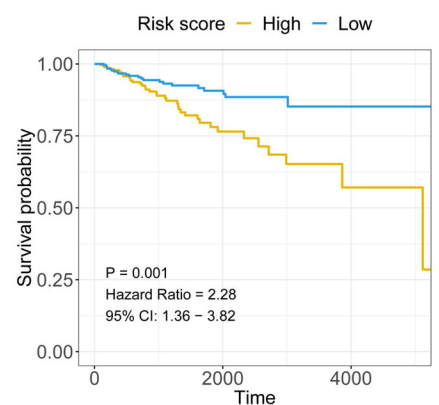



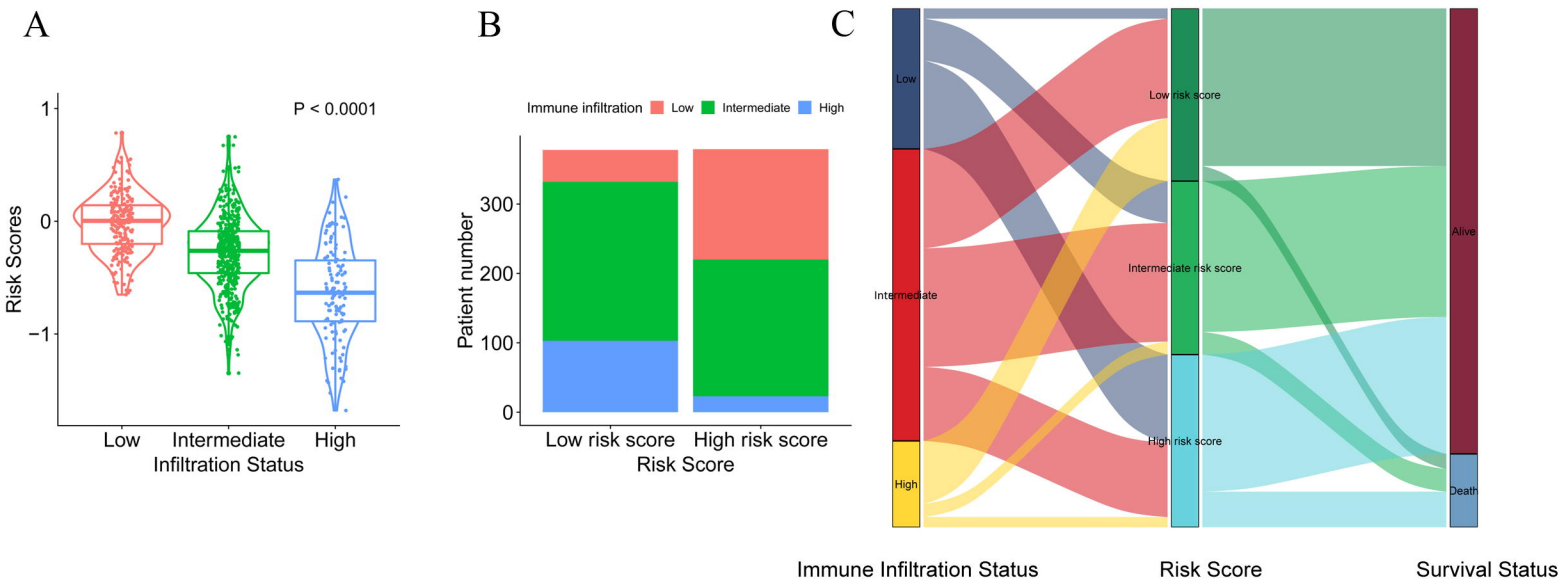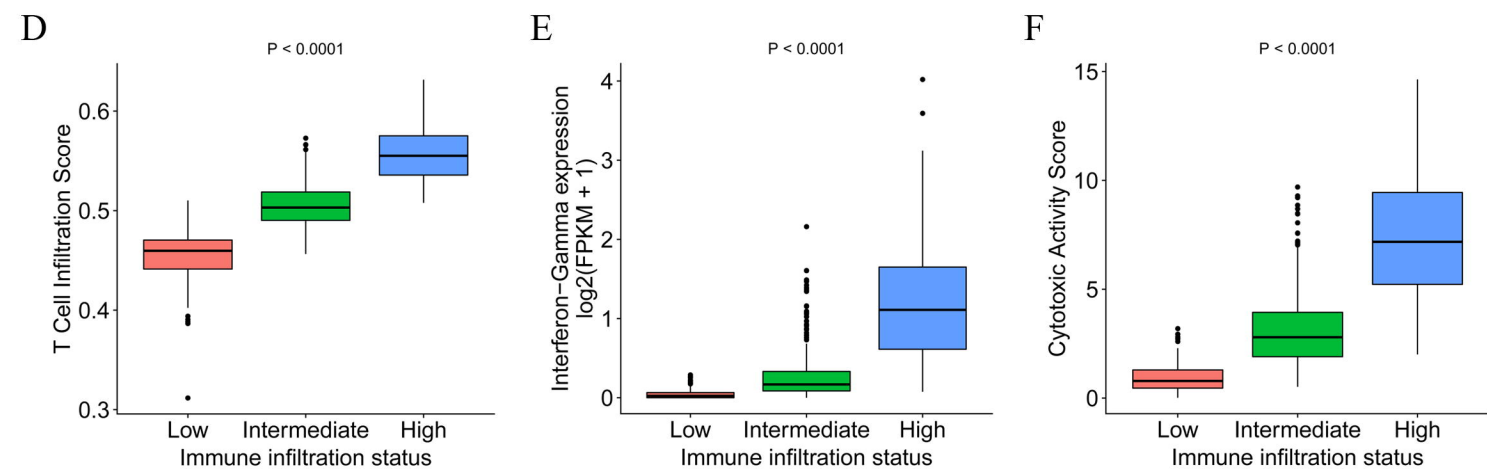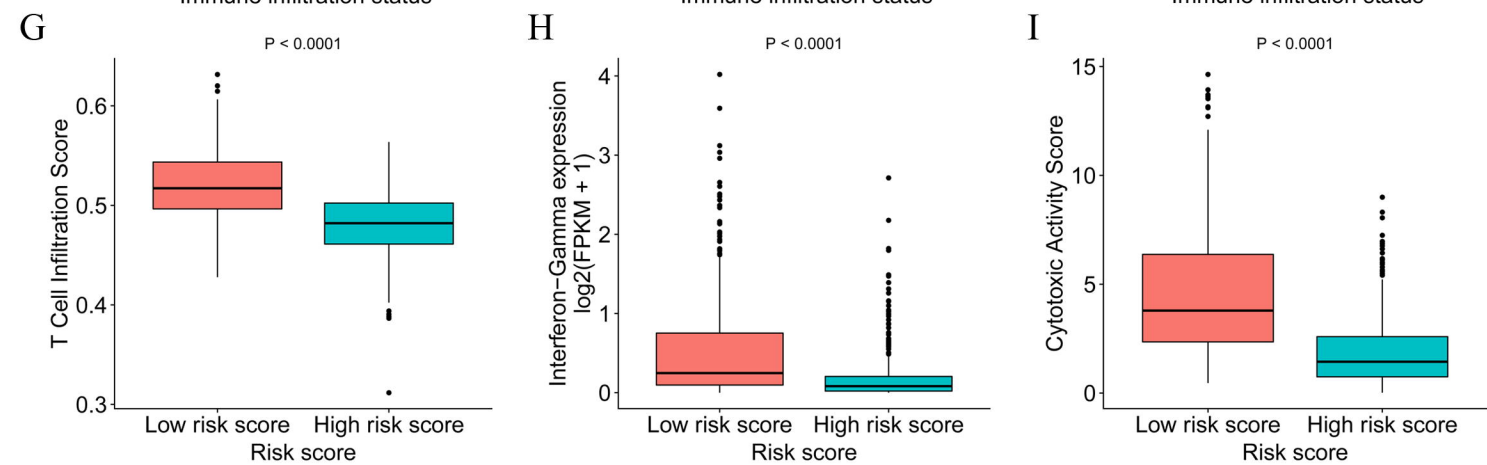

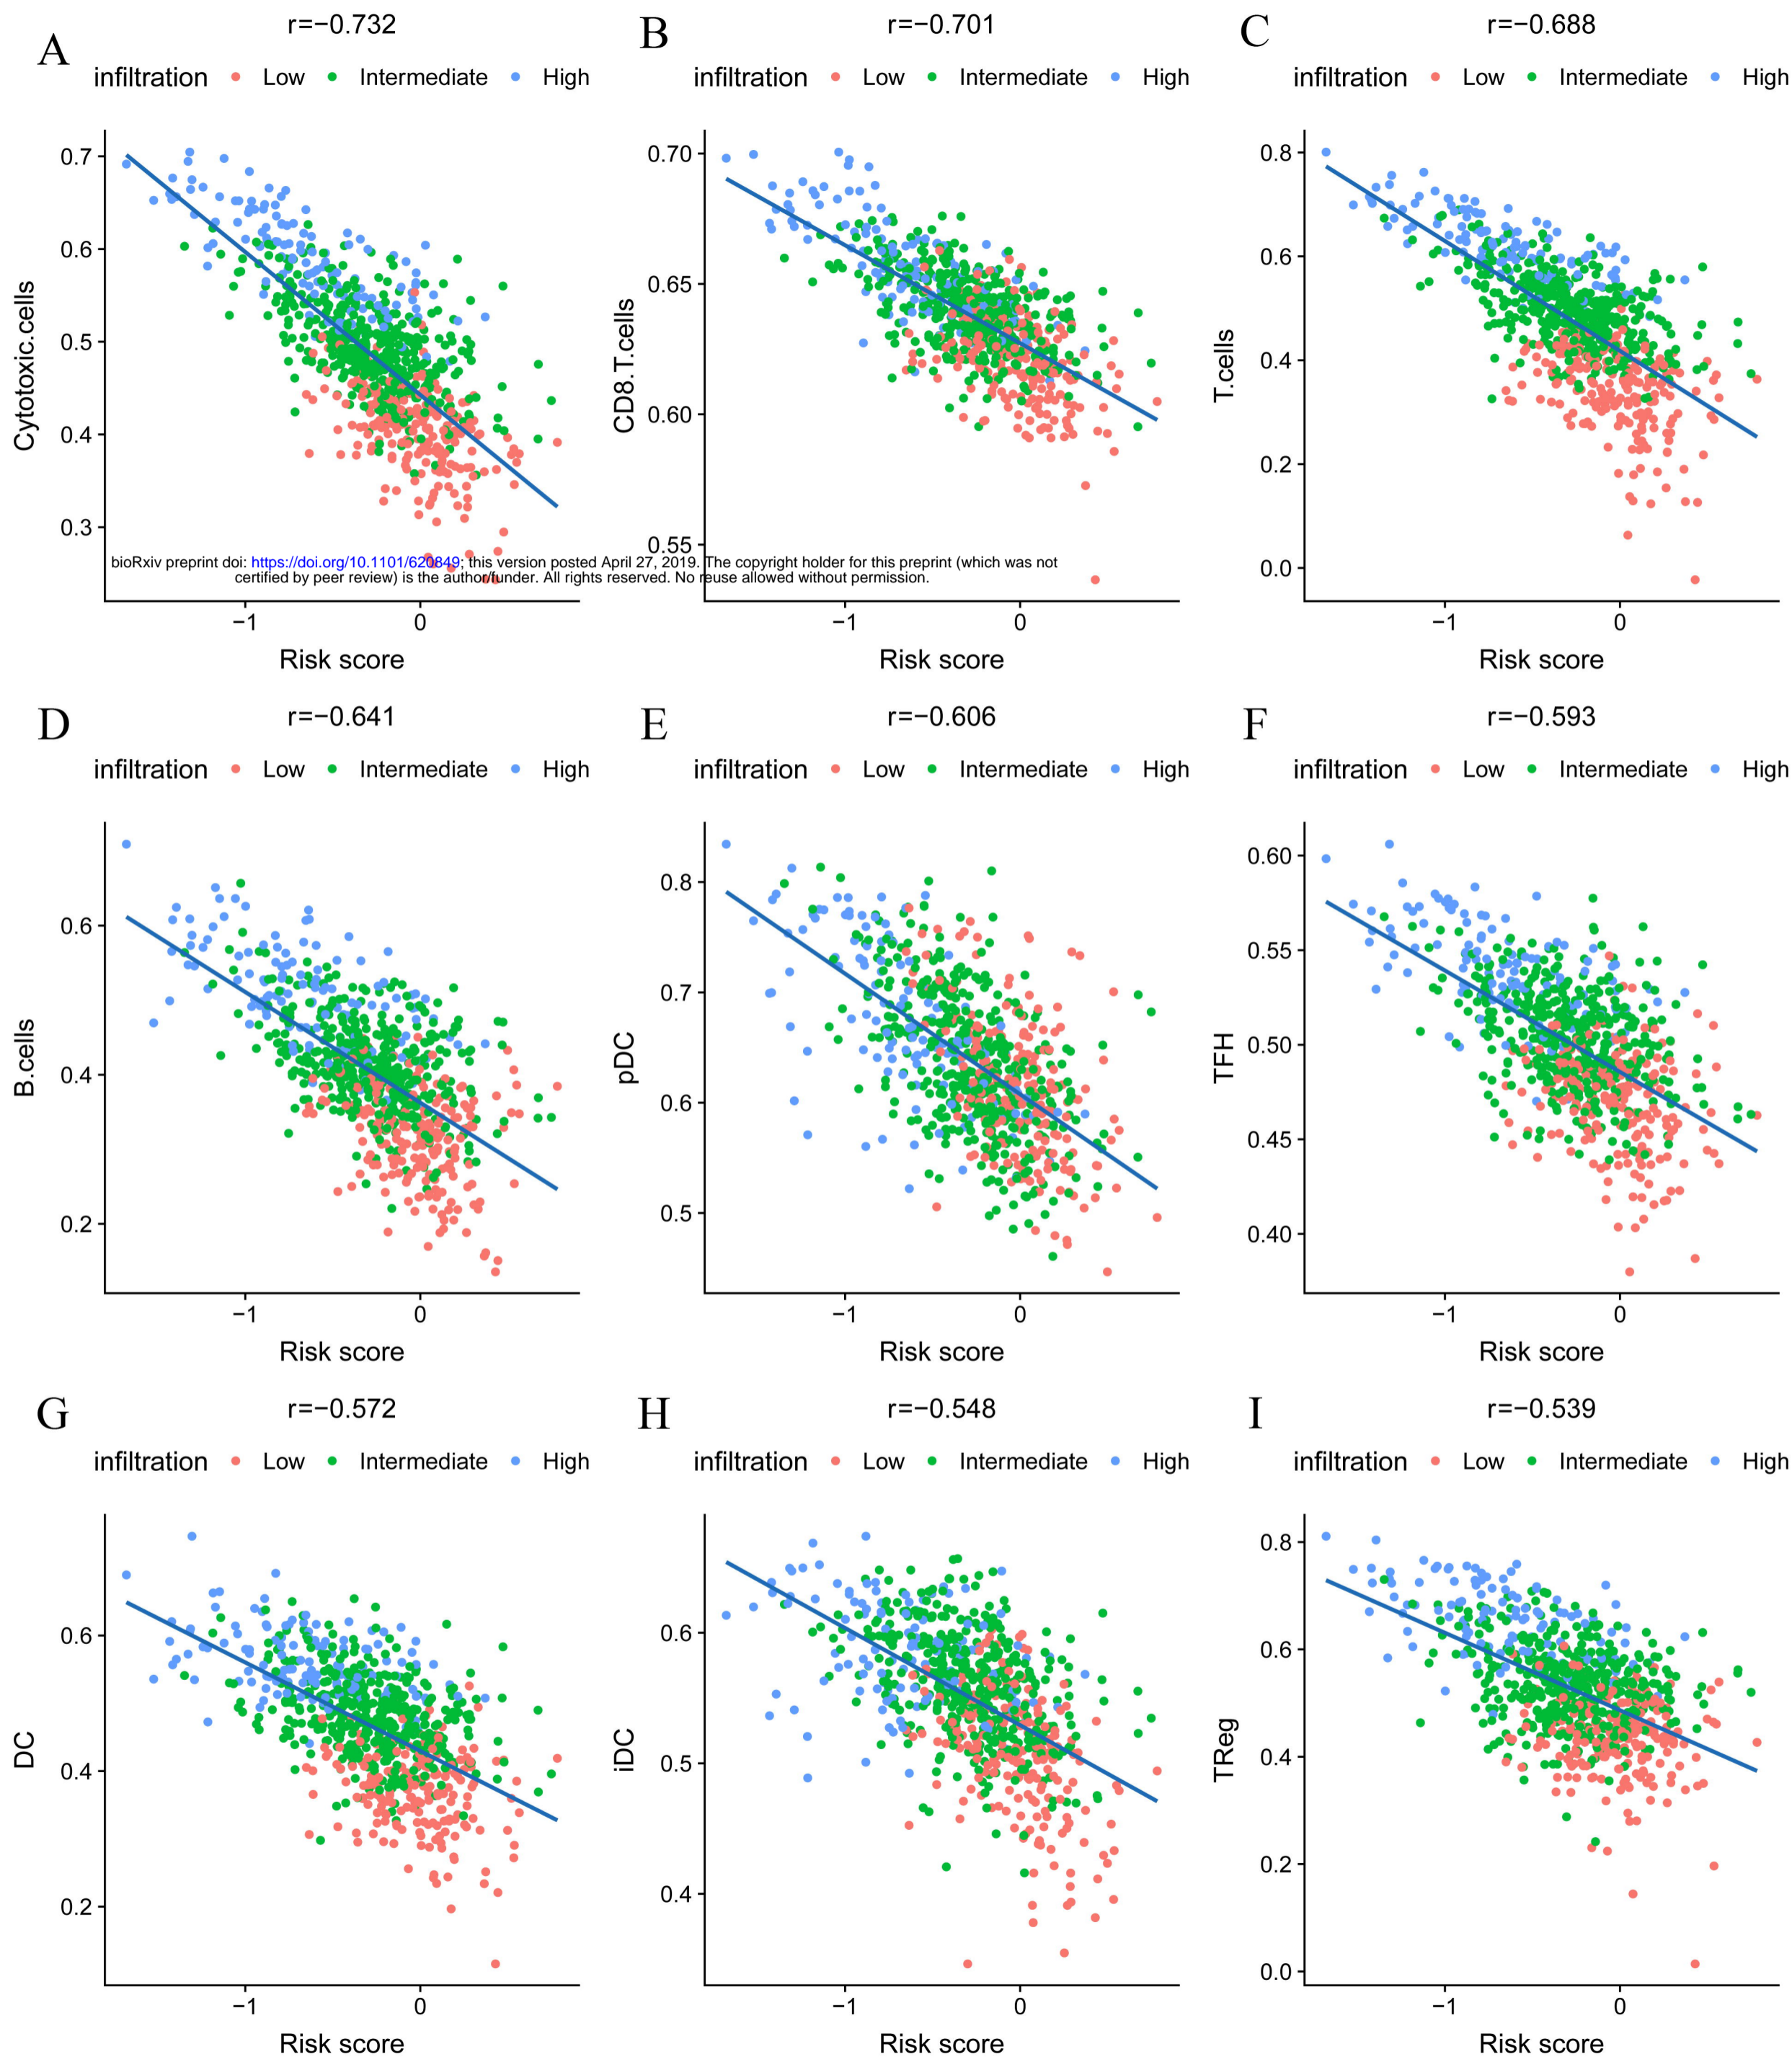

A

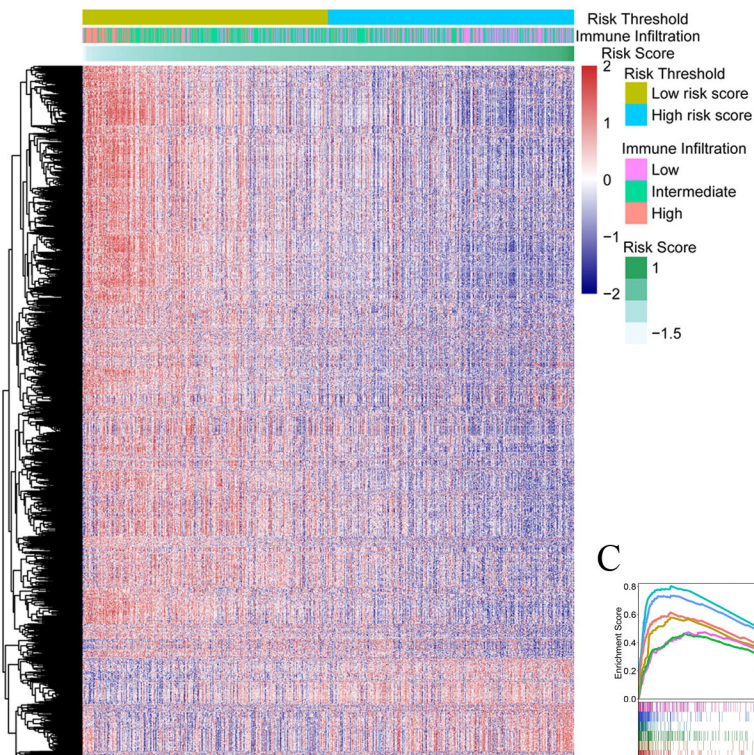

B

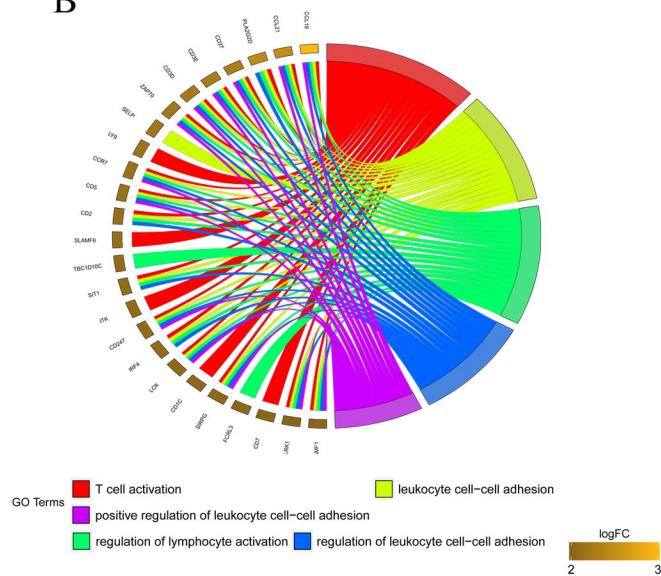

C

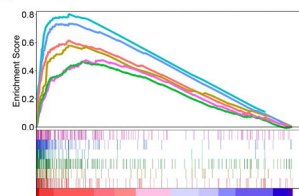

D

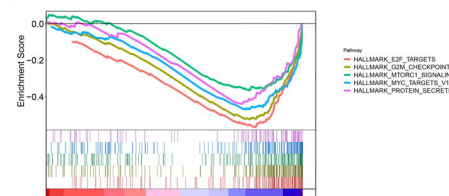

E

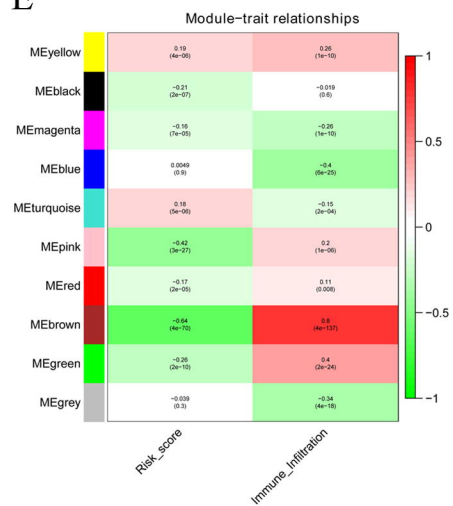

F

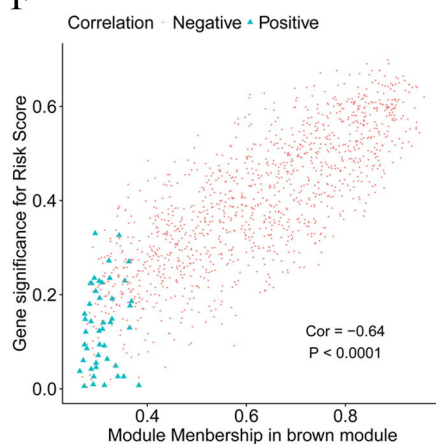

G

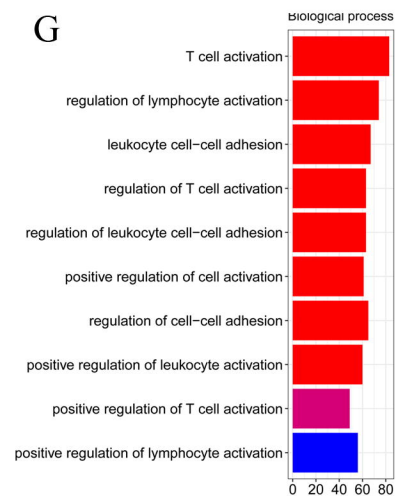

A

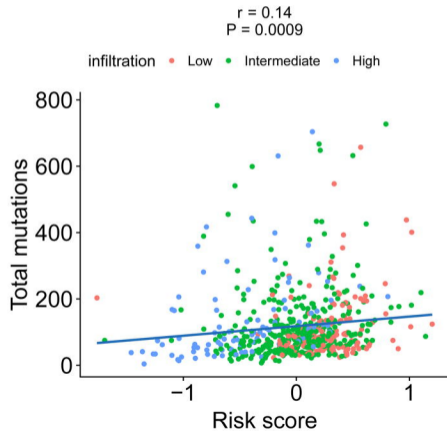

B

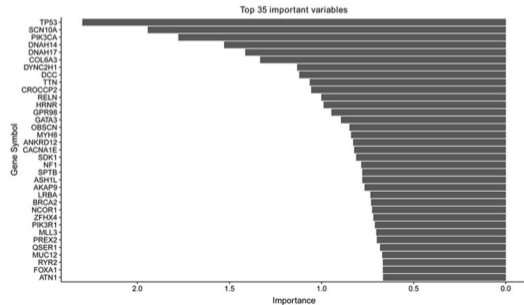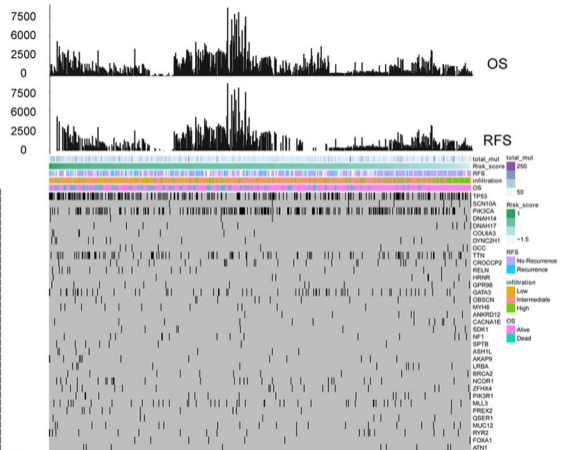

A

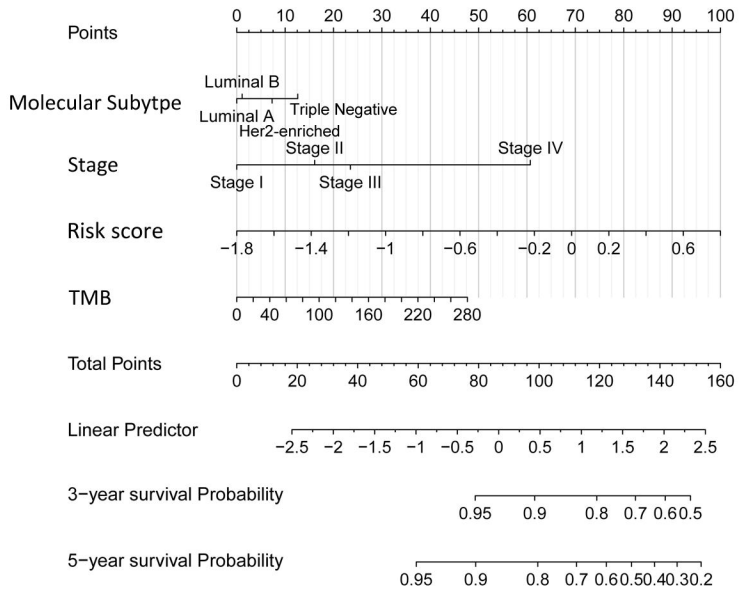

B

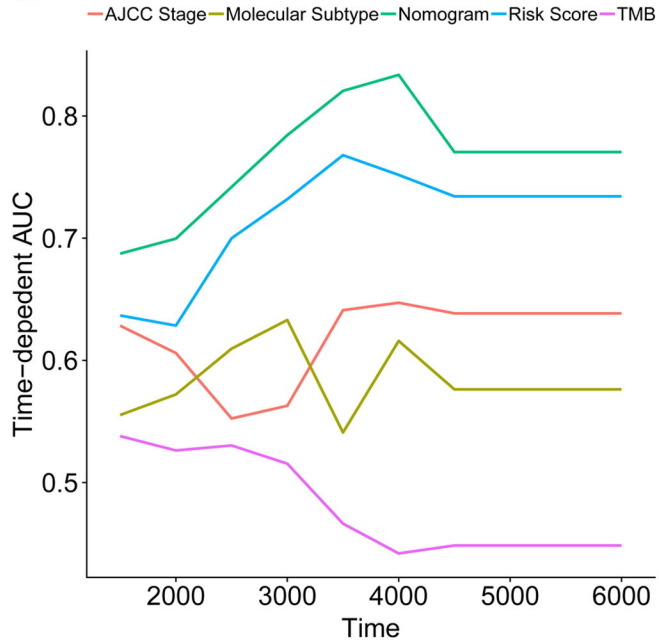

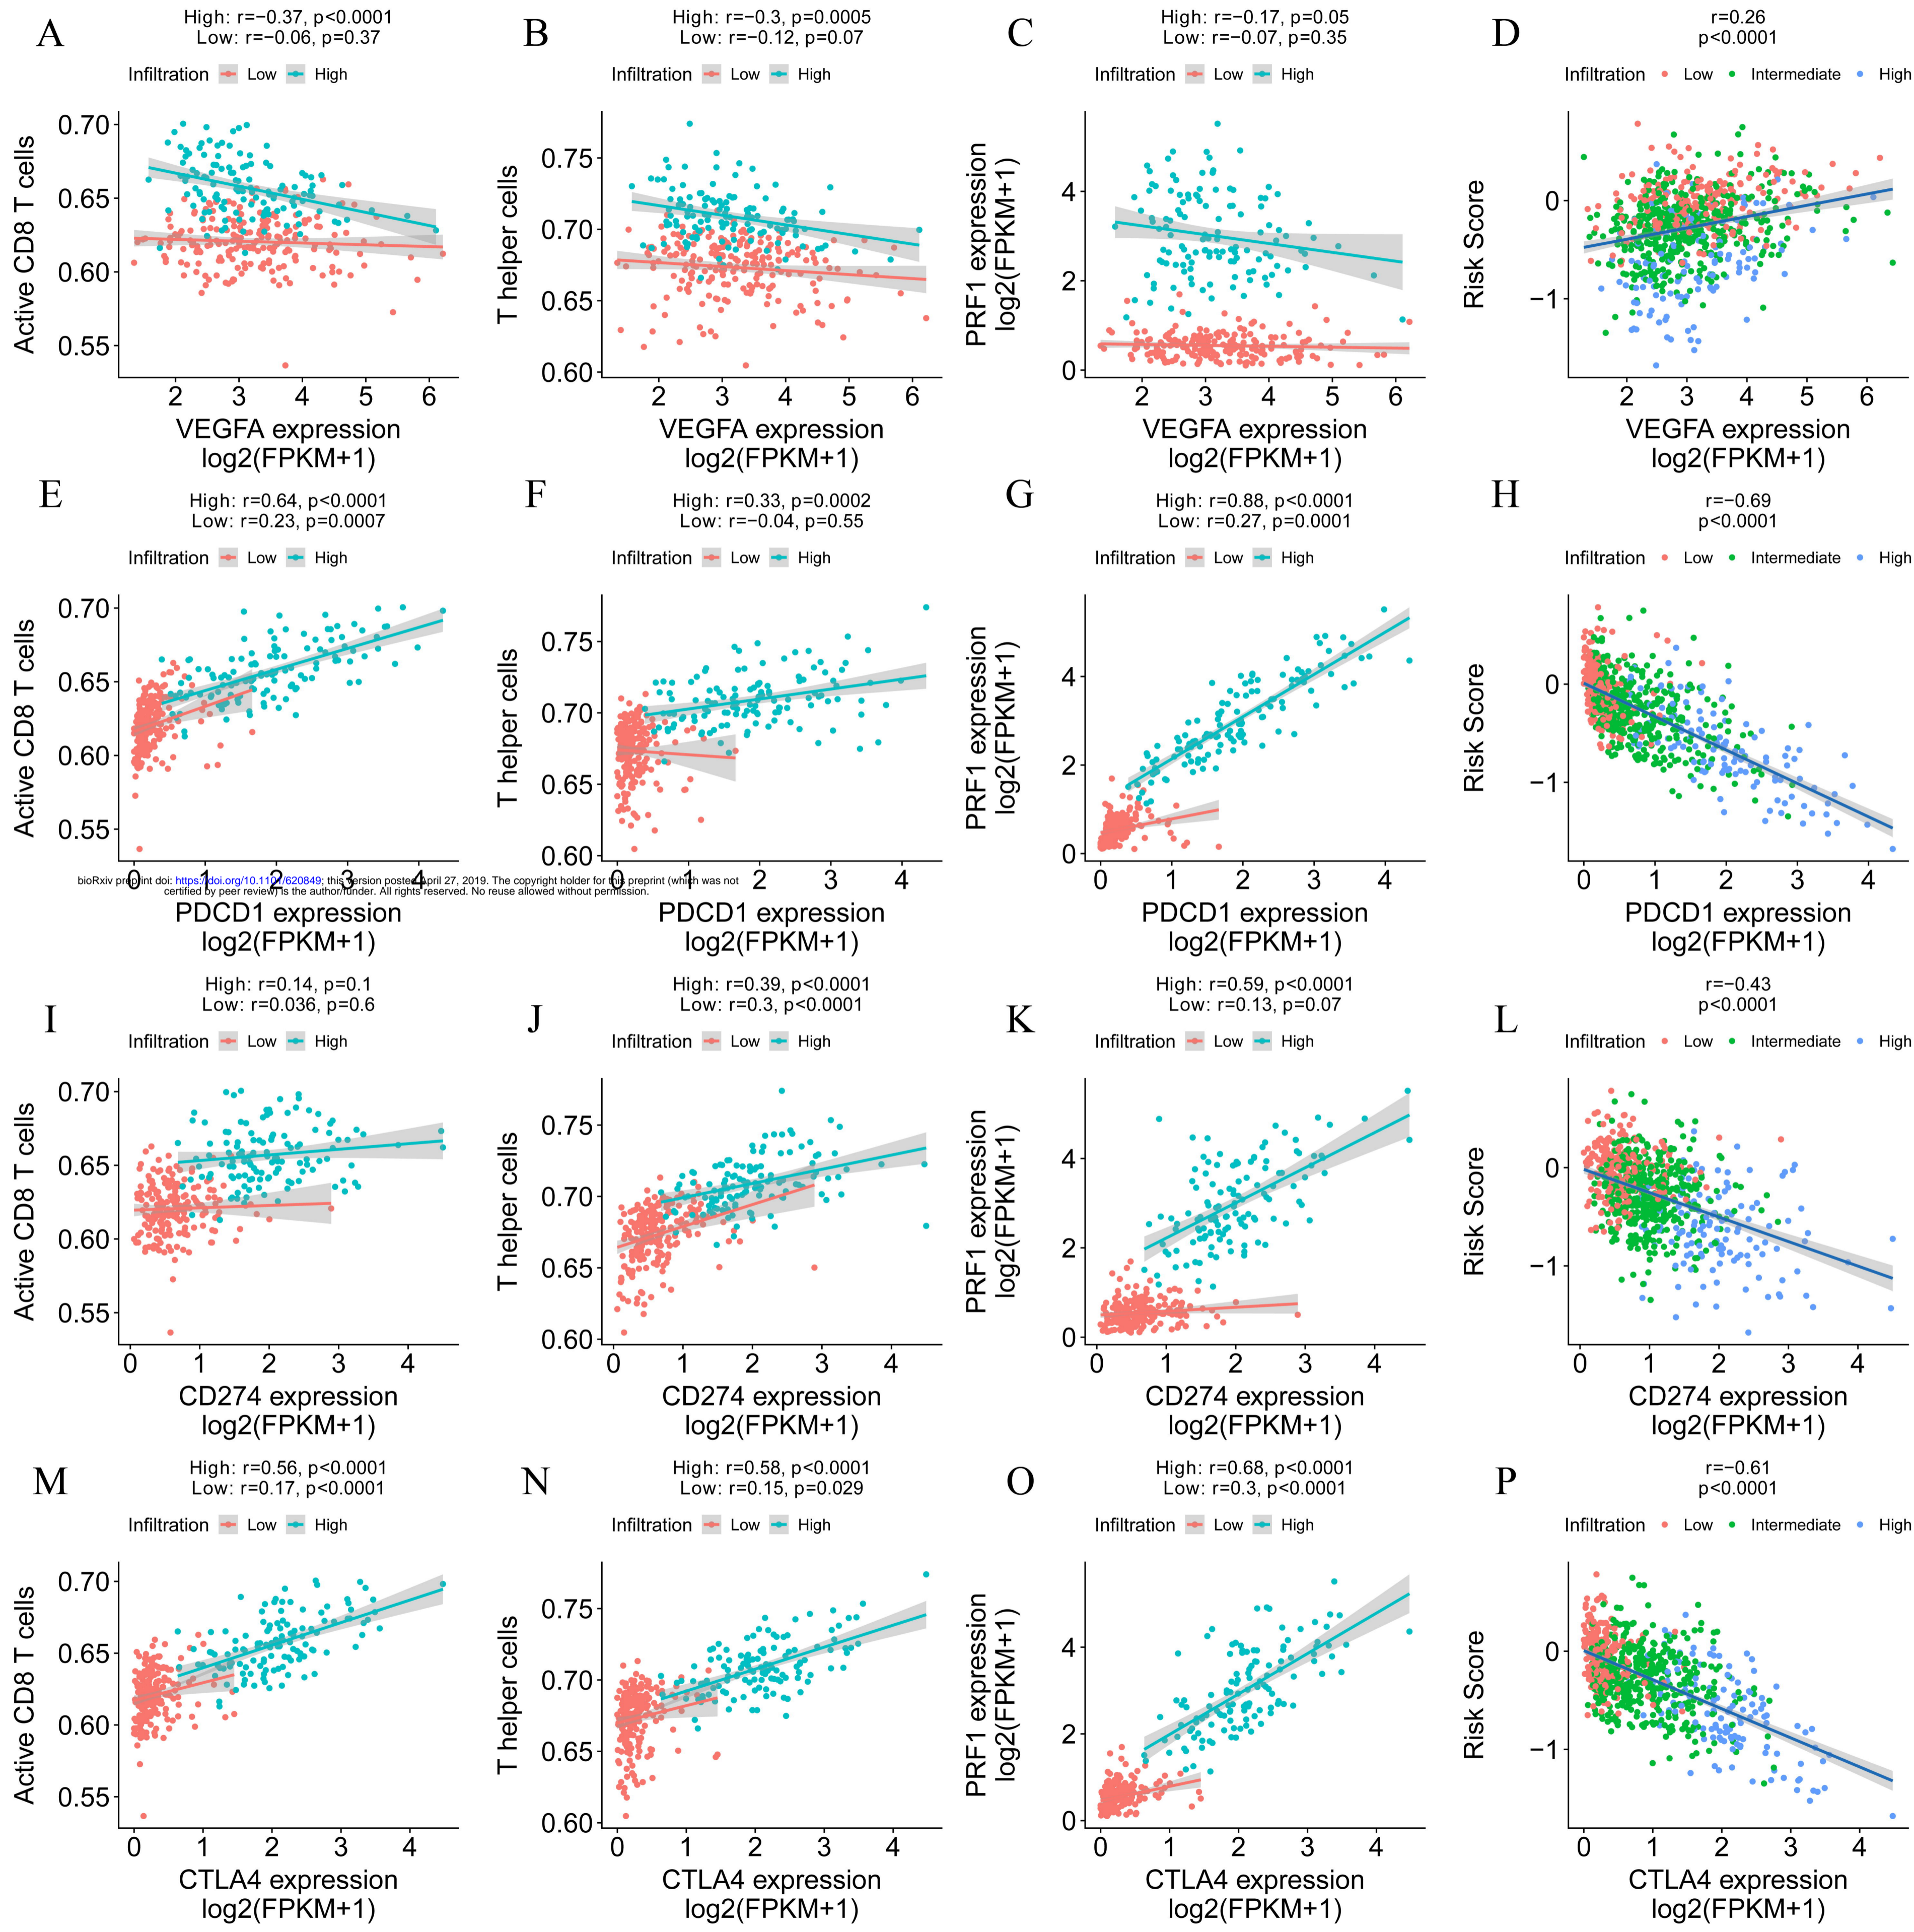

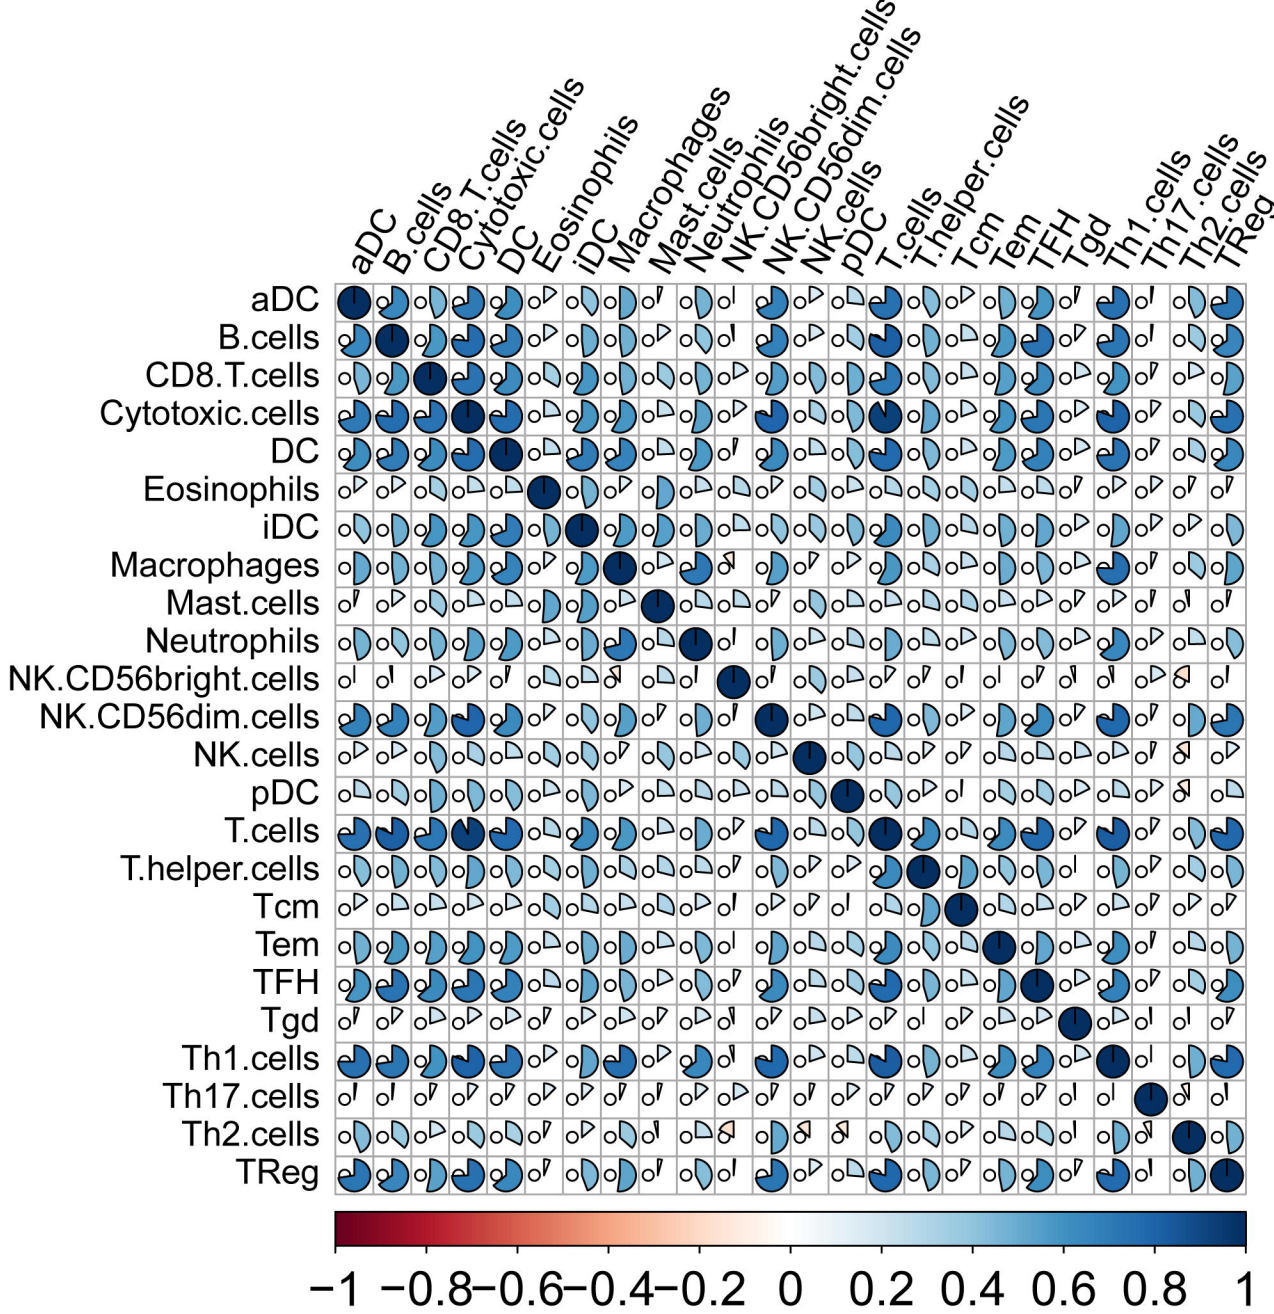

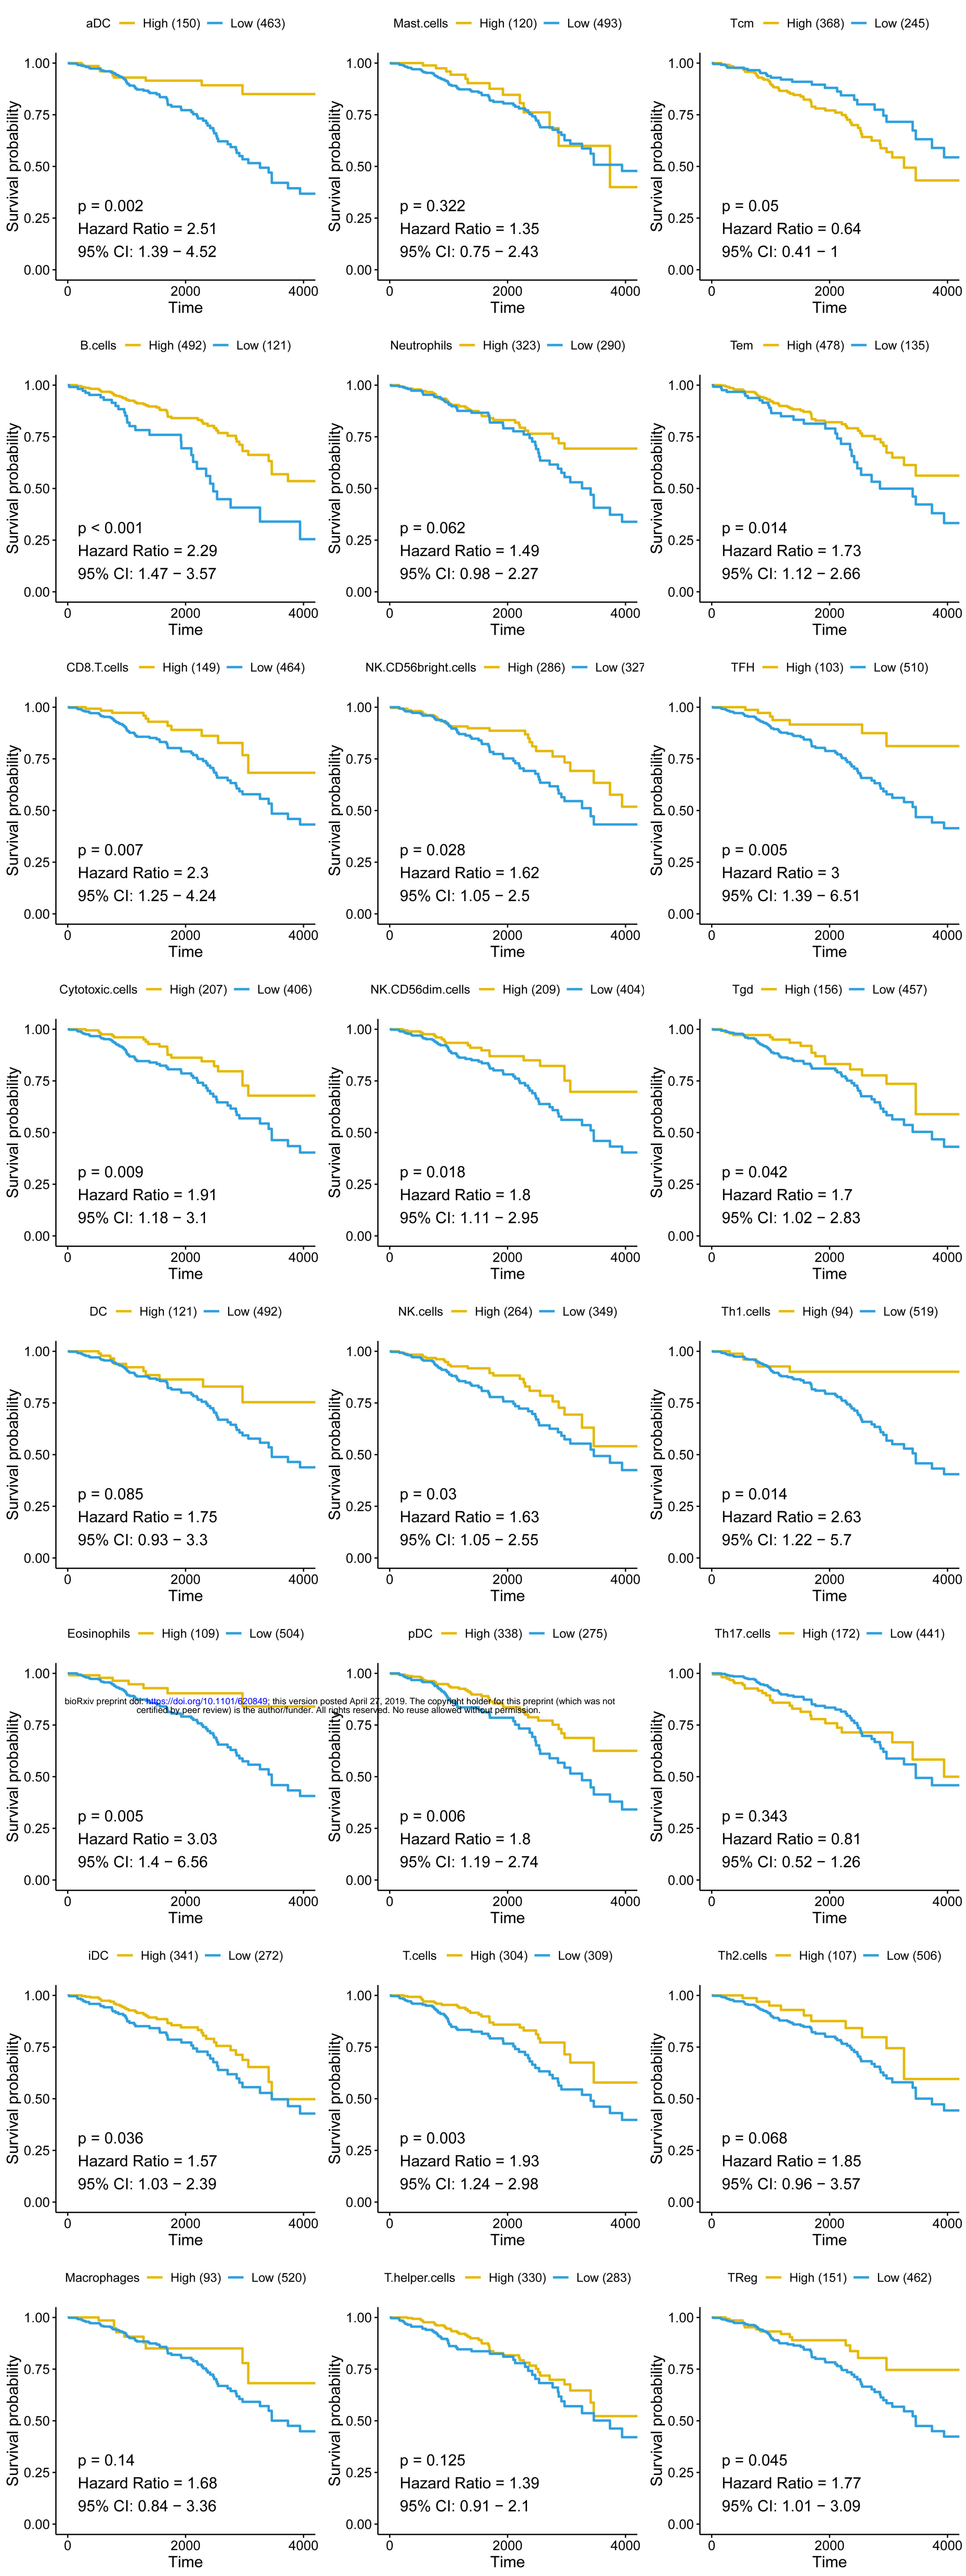



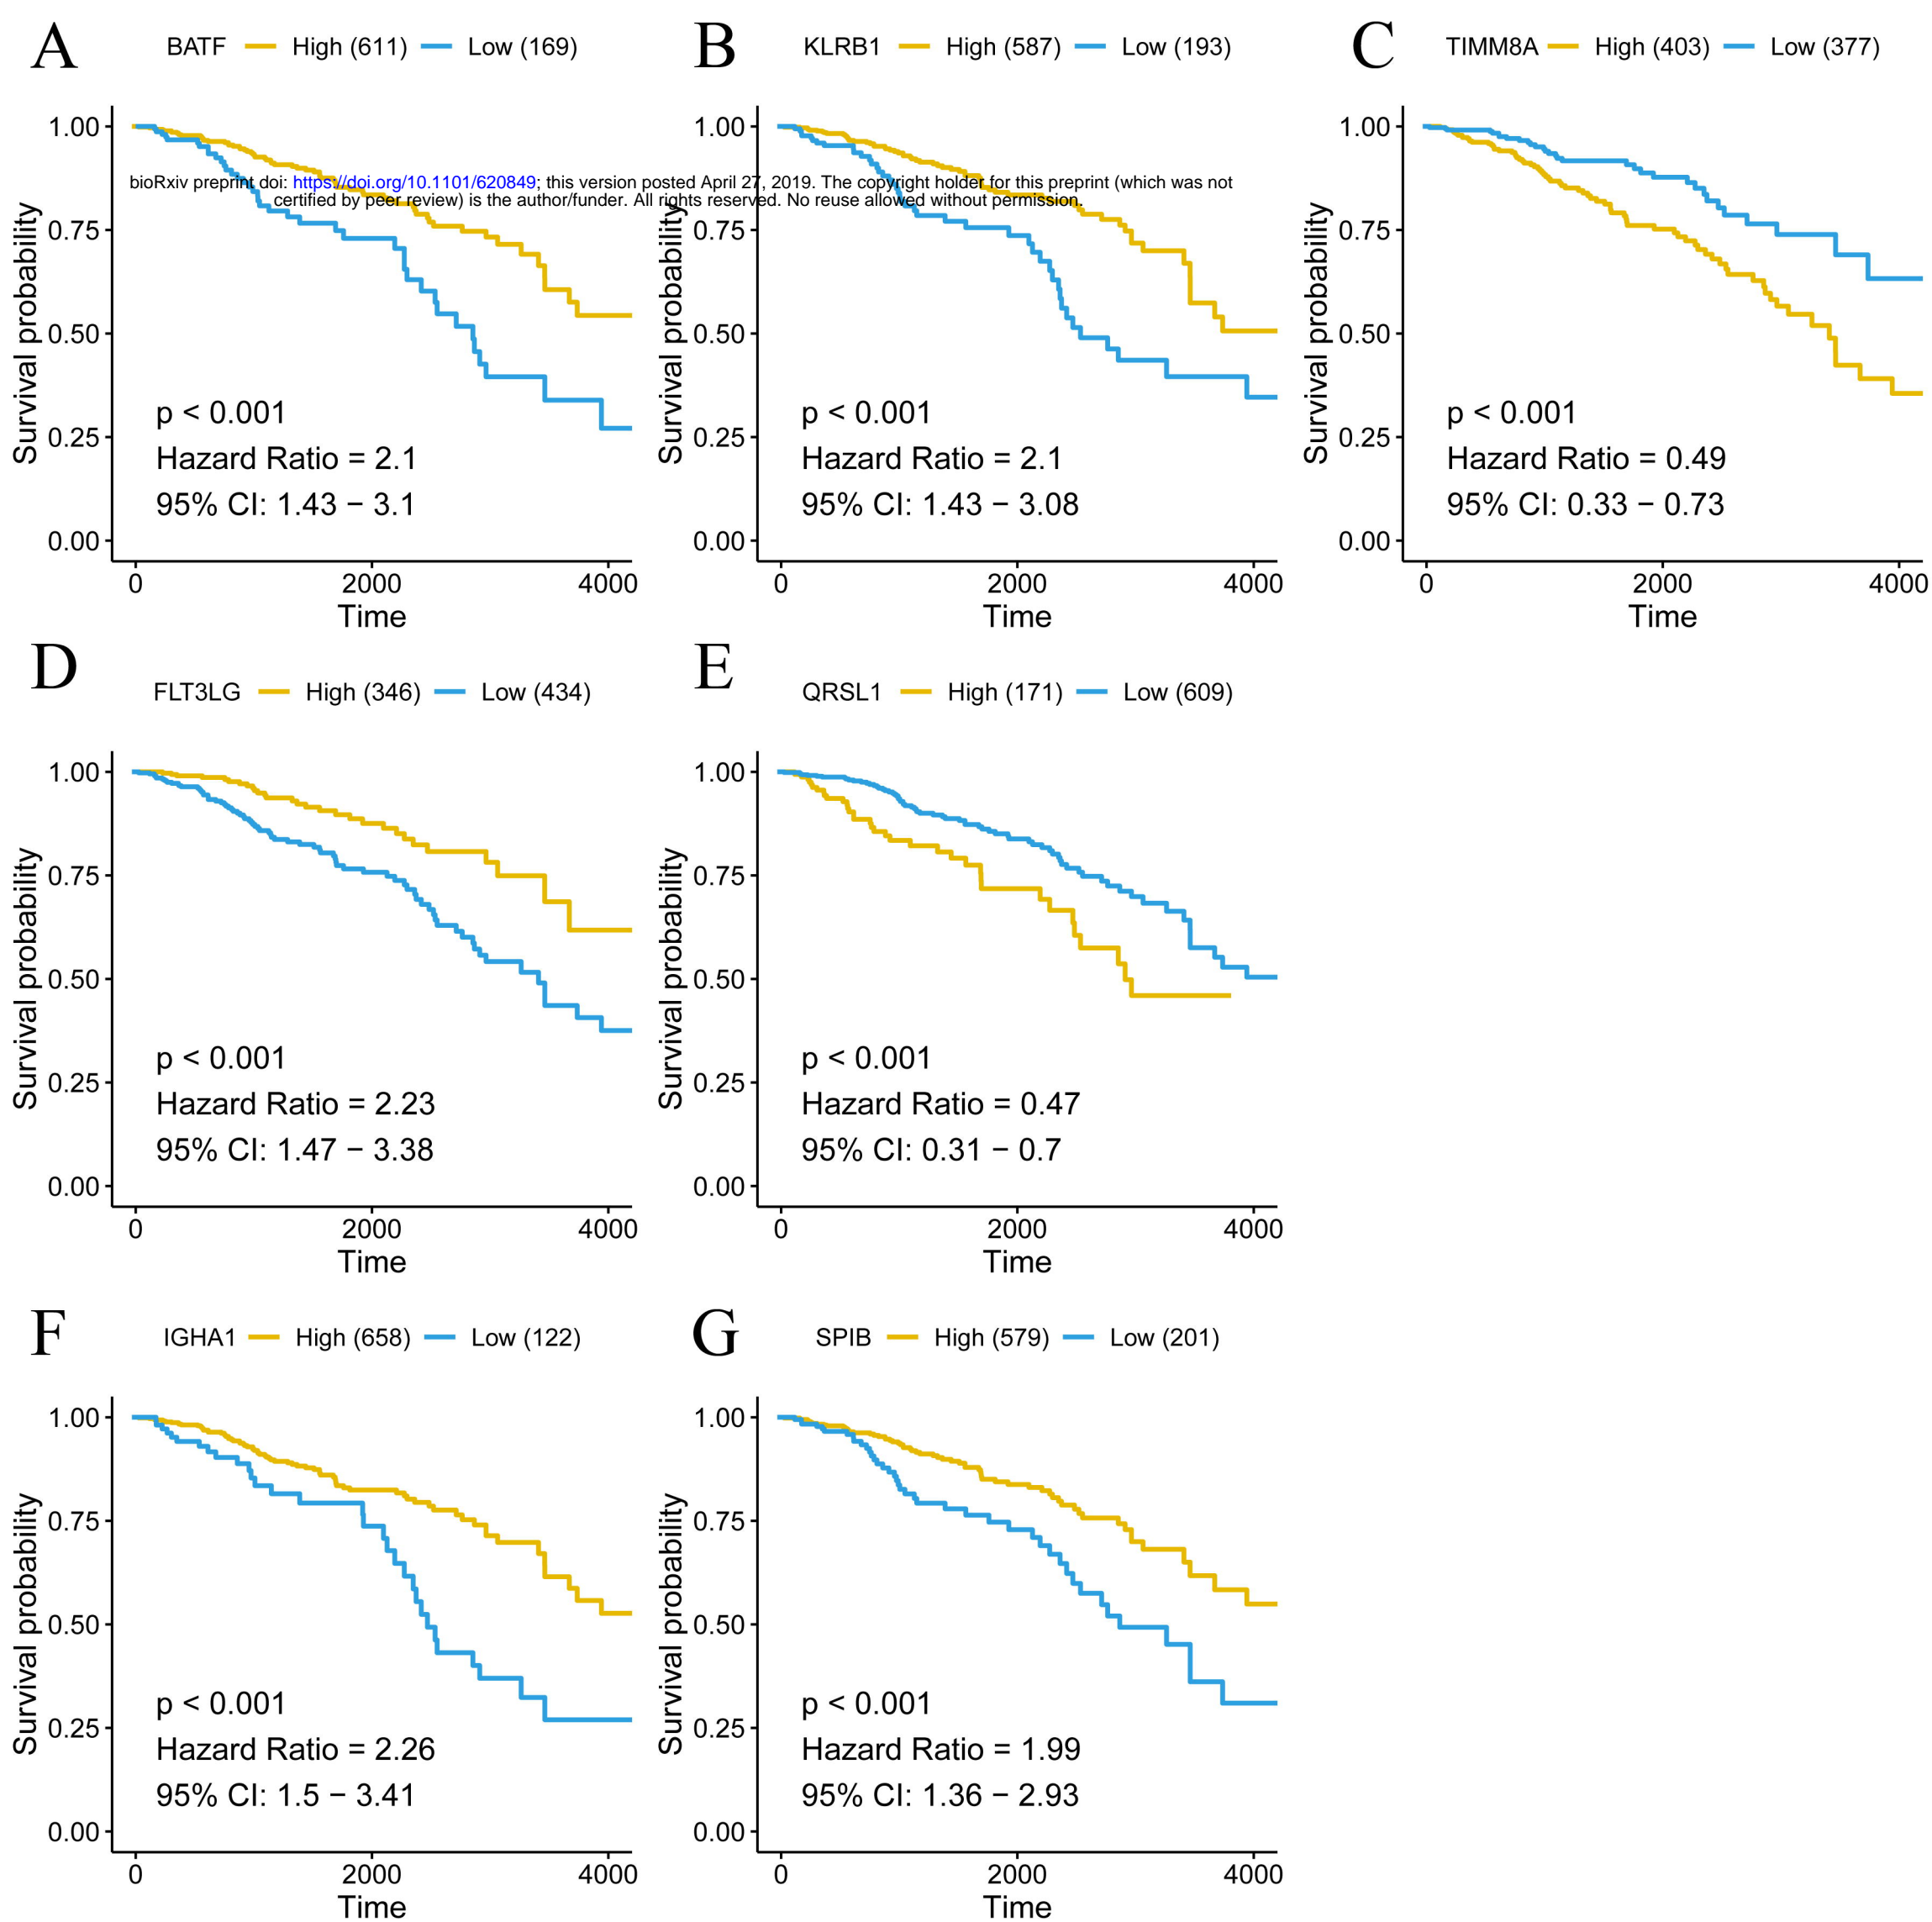

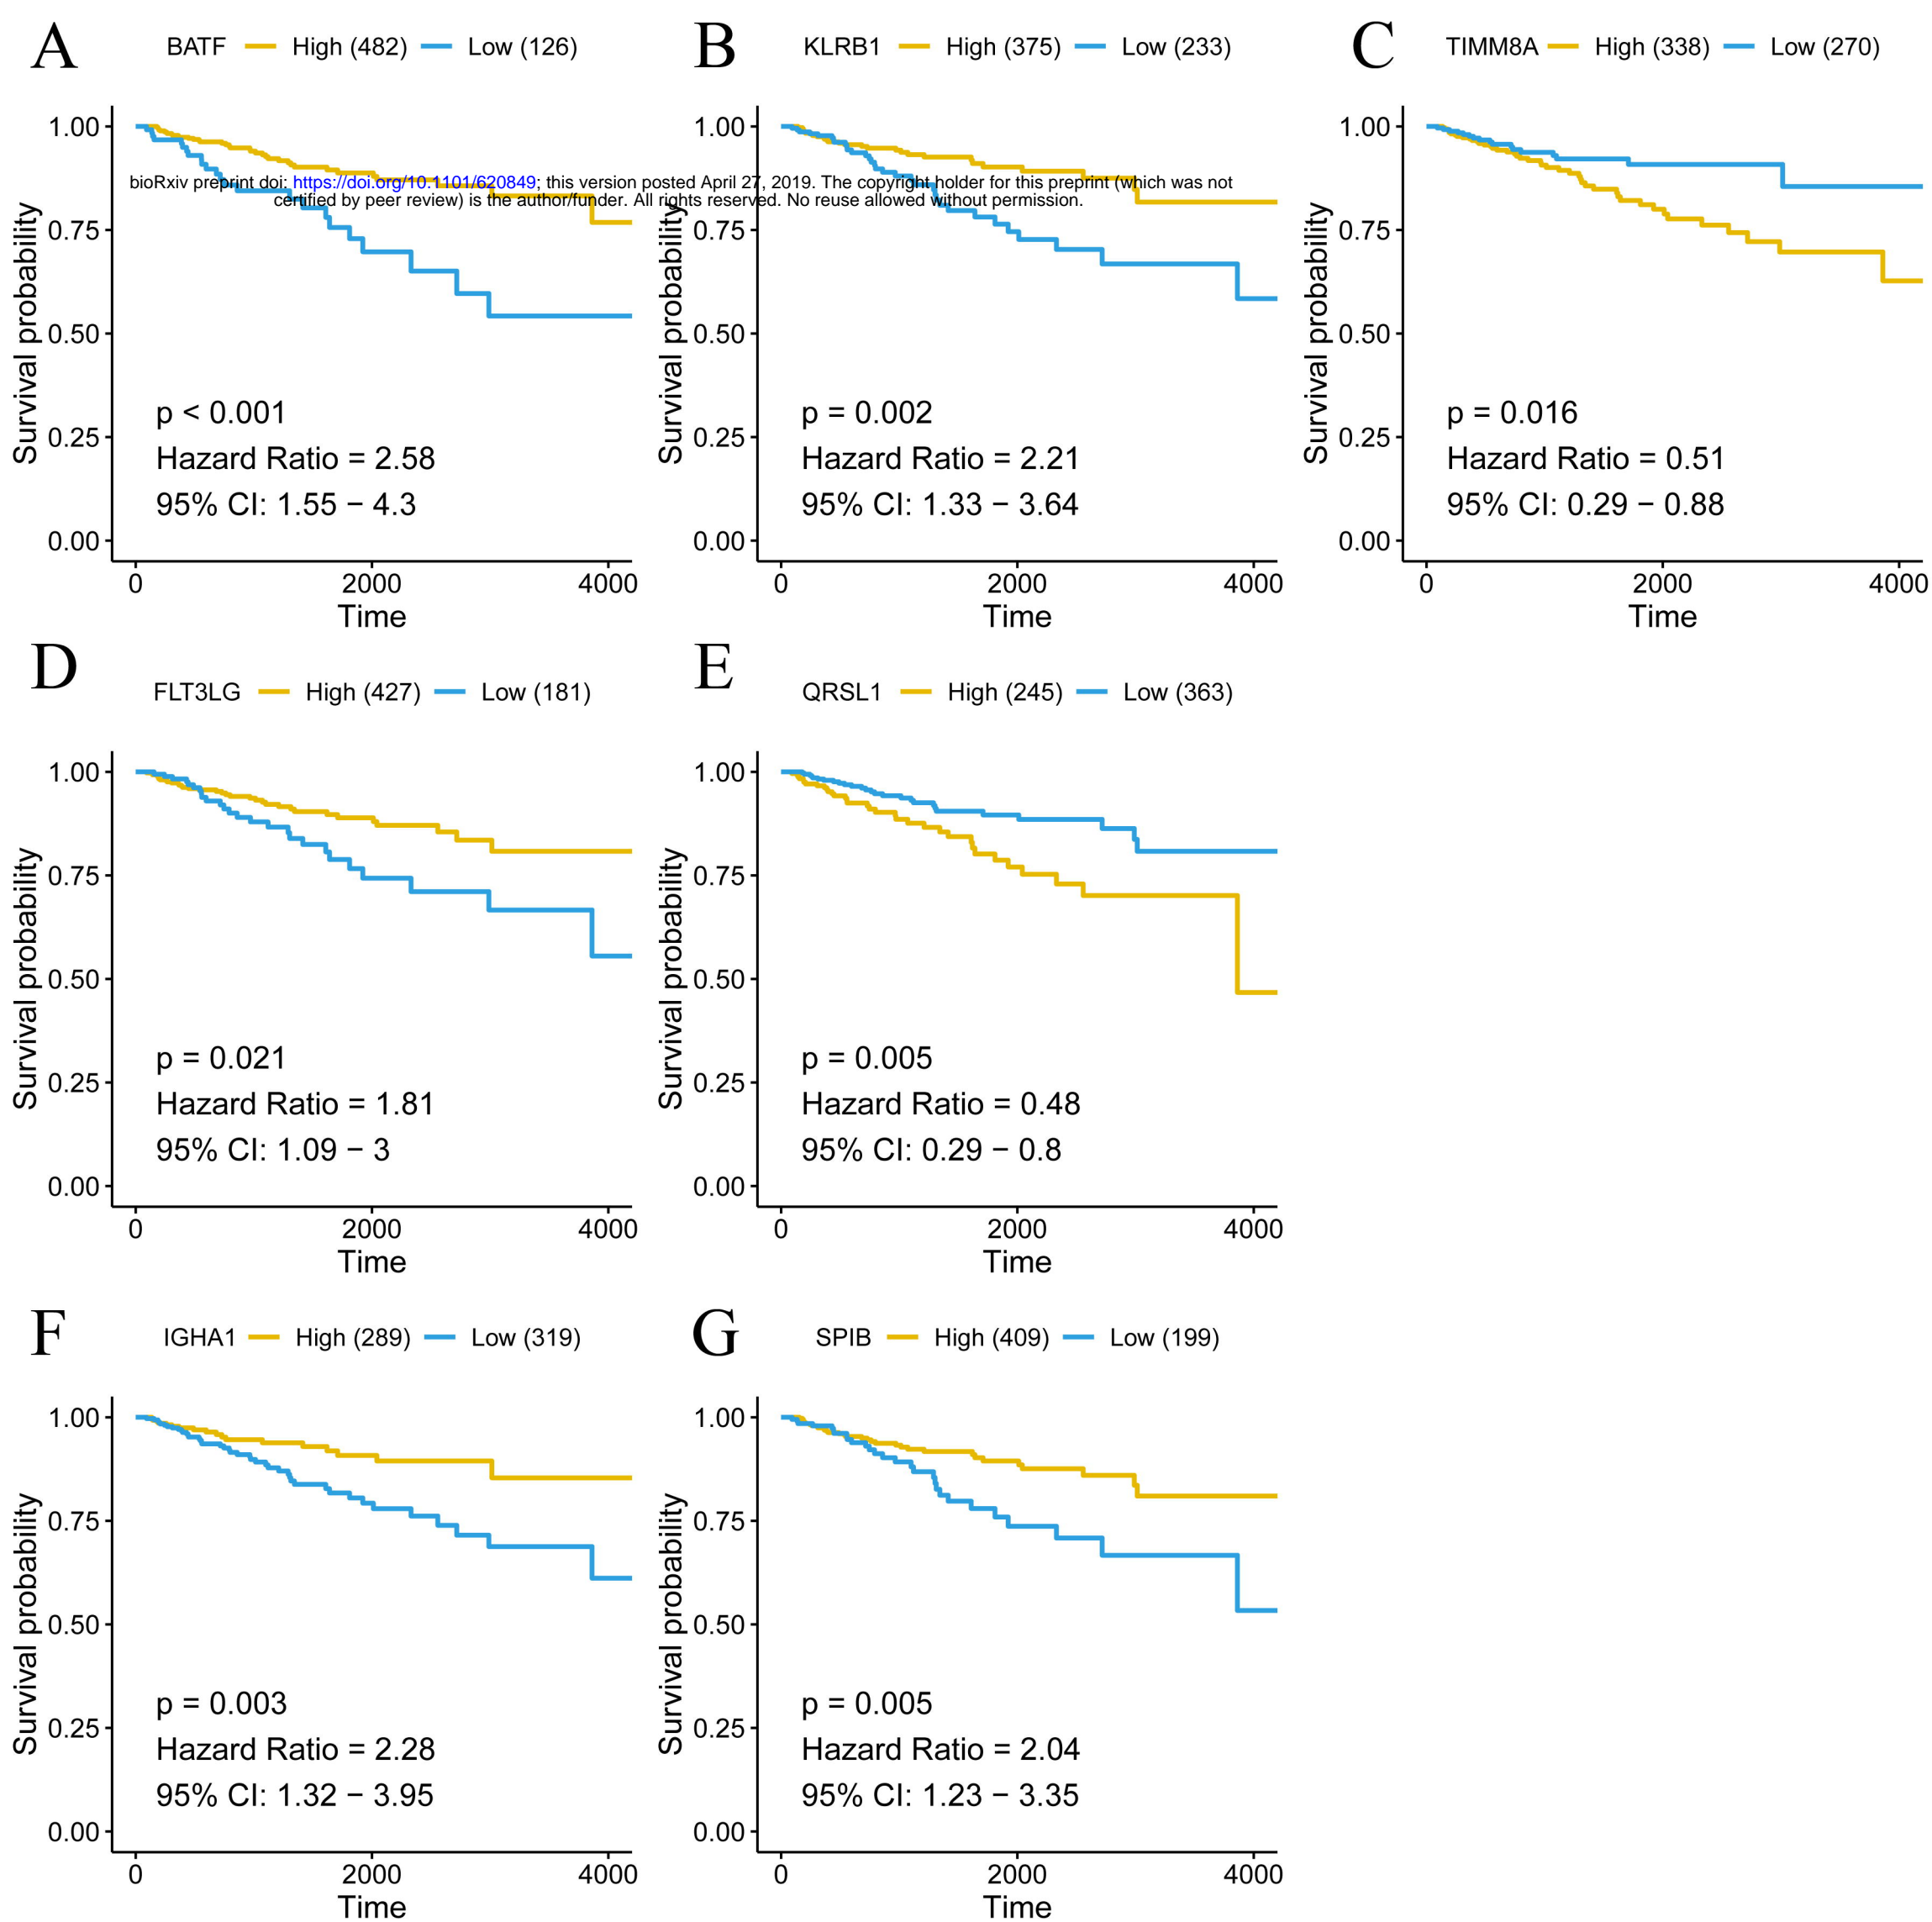

A

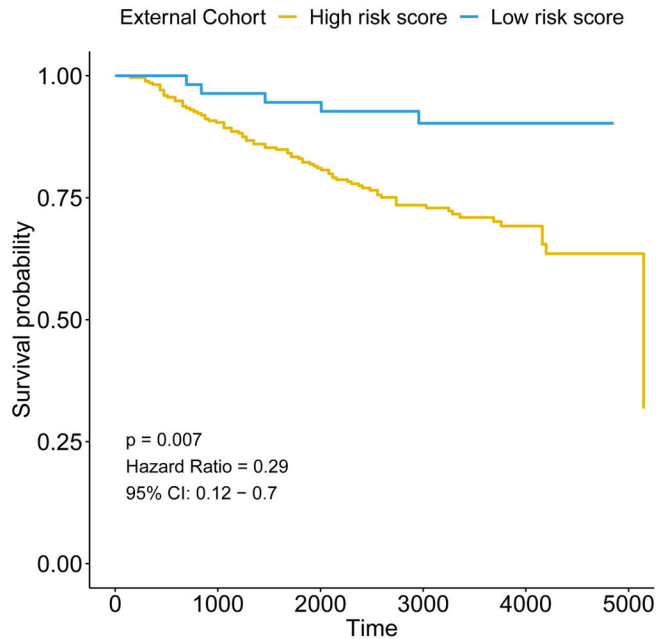

B

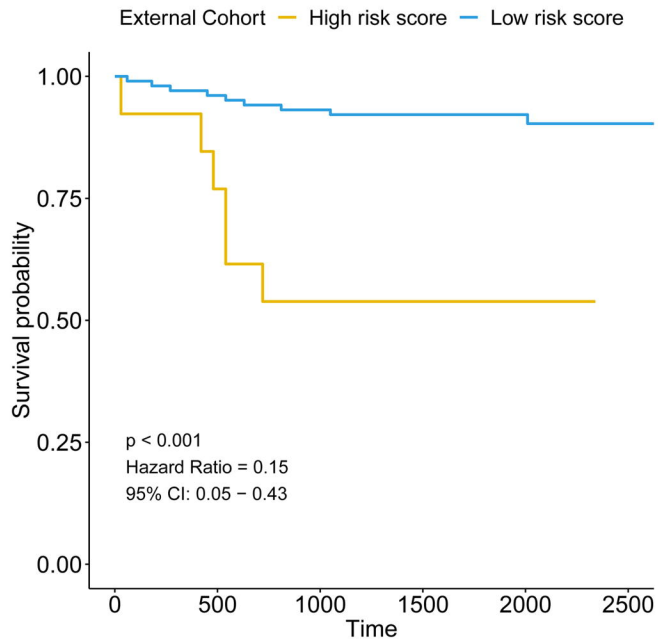

**A**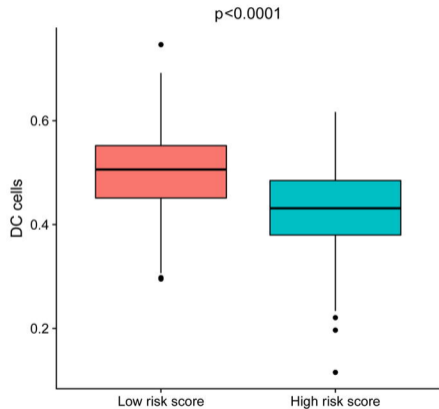**B**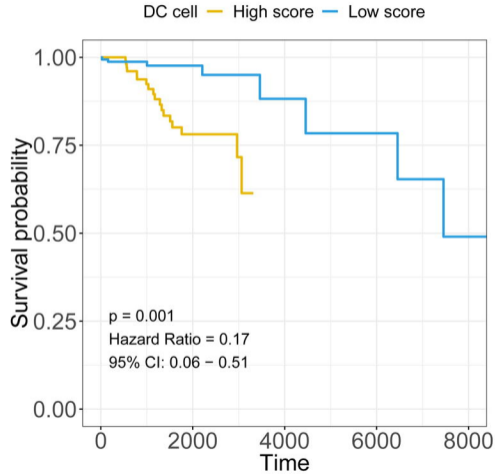**C**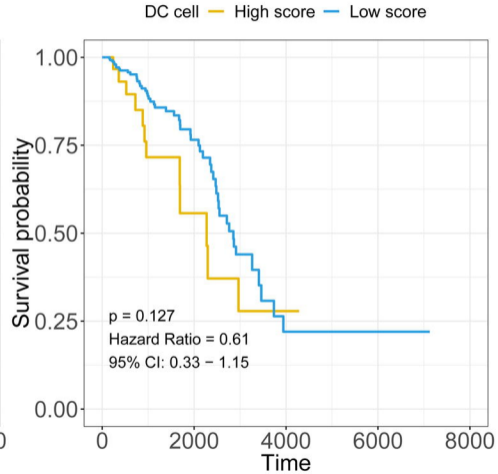

A

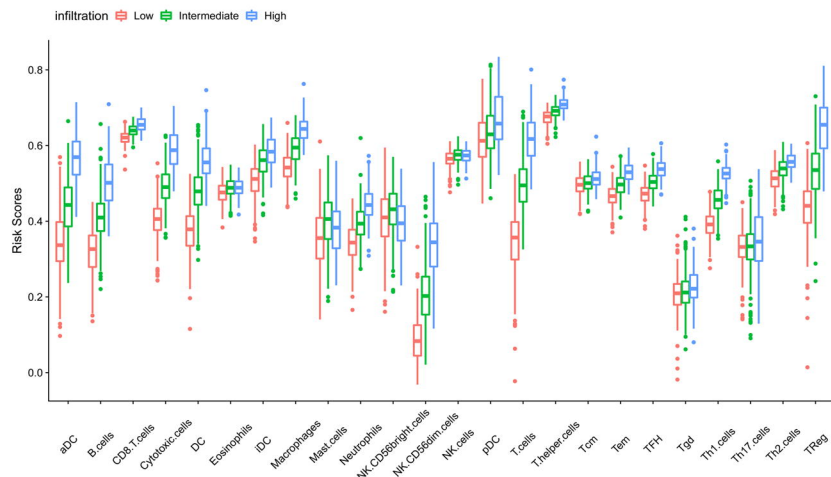

B

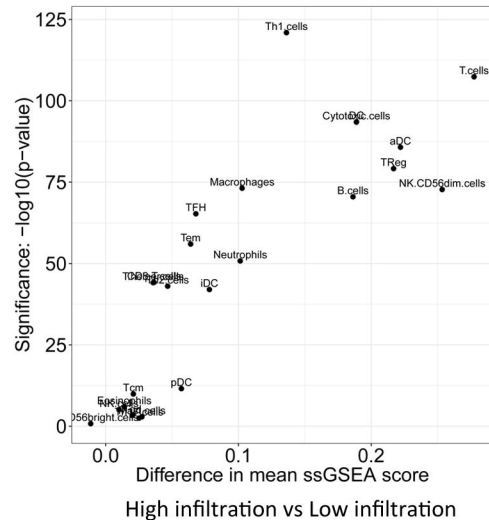

C

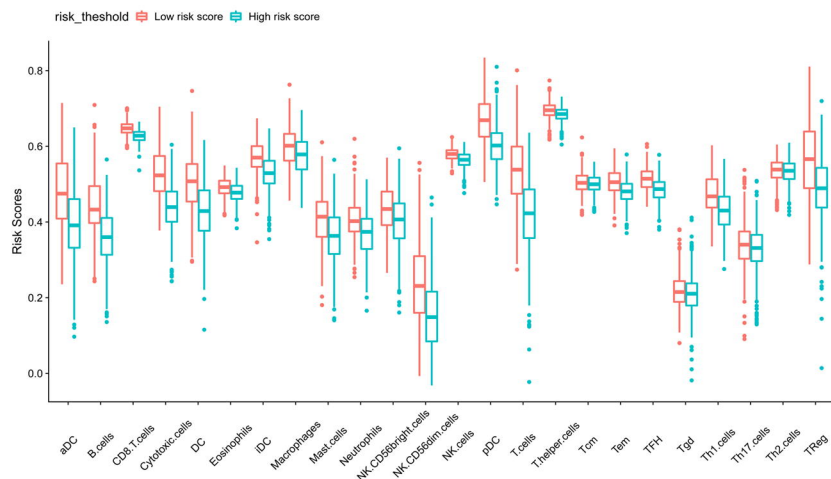

D

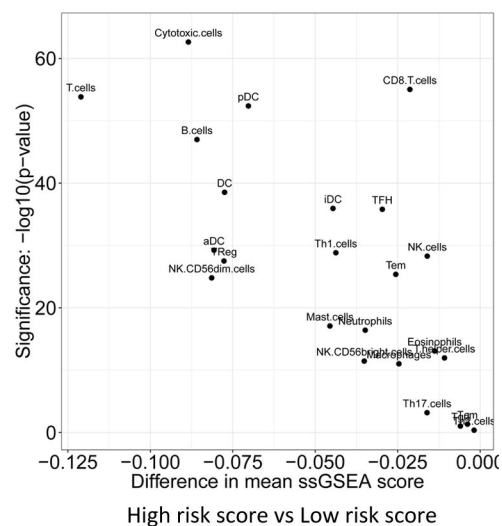

E

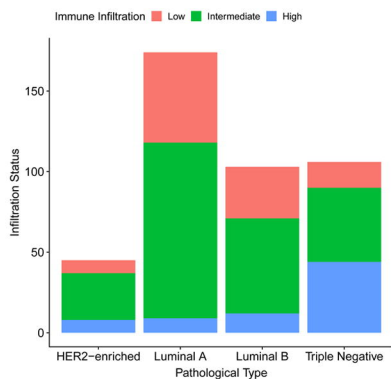

F

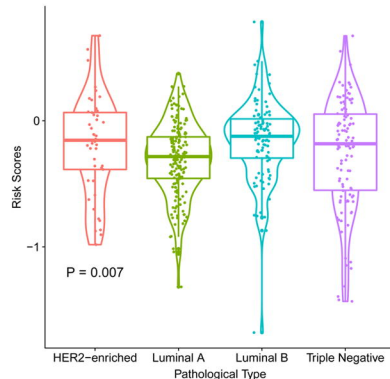

G

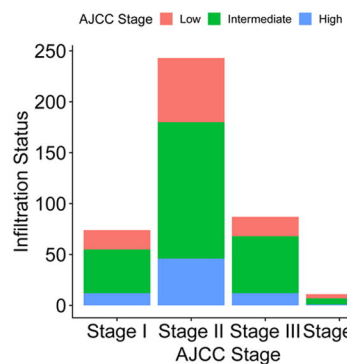

H

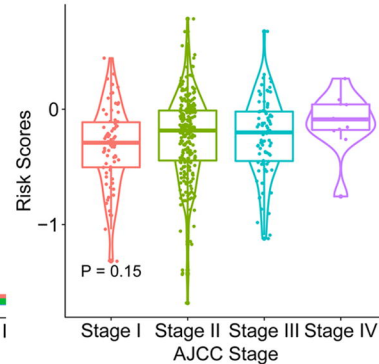

**A**

Scale independence

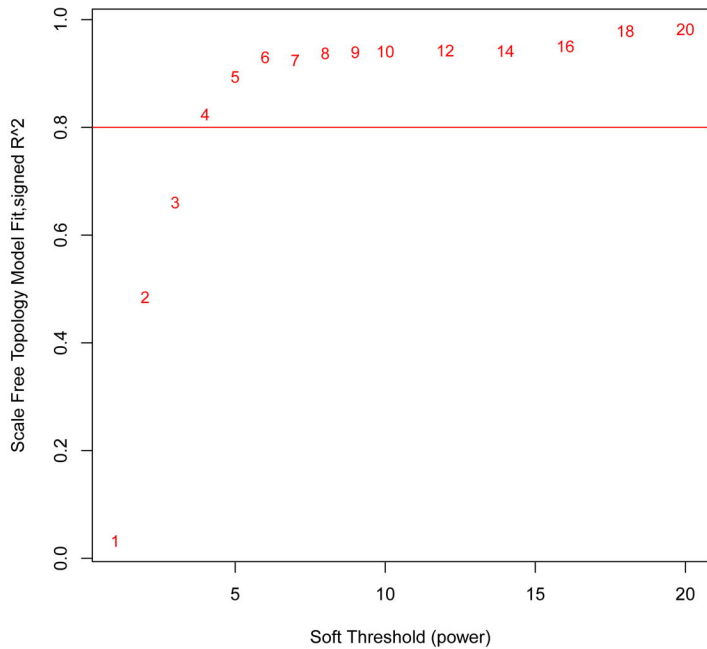**B**

Mean connectivity

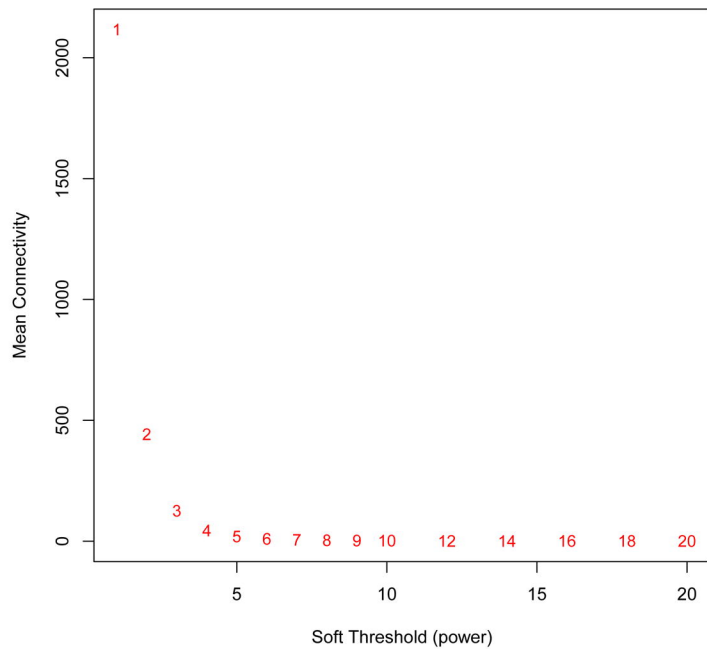

A

TCGA cohort

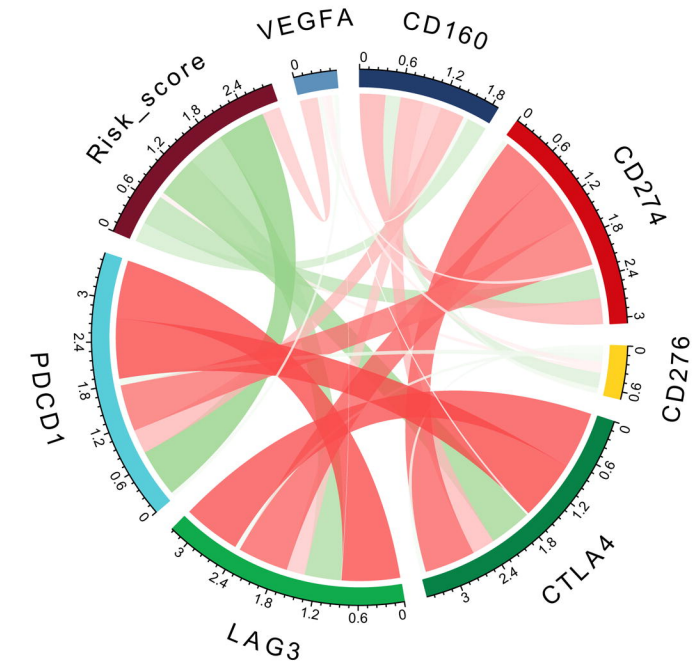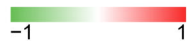

B

GSE20685

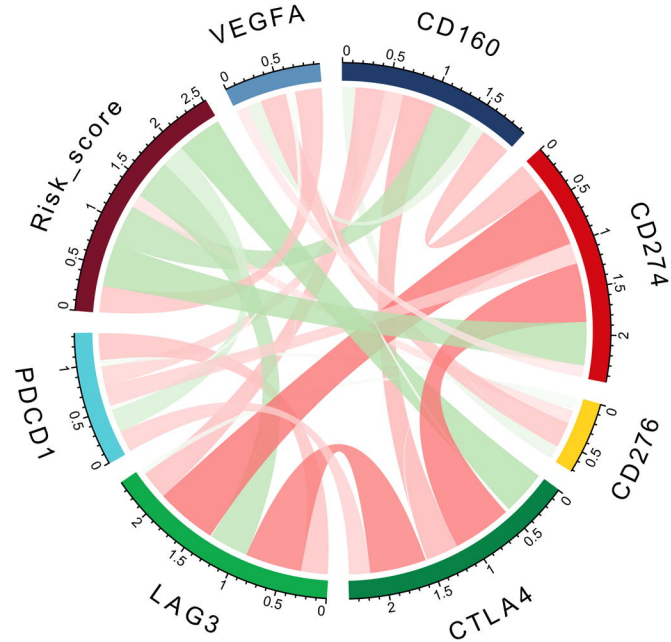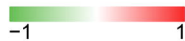

Source: https://www.biorxiv.org/content/10.1101/620849v1.full.pdf
